# Supplementary material for: Improved Rainfall Prediction through Nonlinear Autoregressive Network with Exogenous Variables: A Case Study in Andes High Mountain Region
Source: Hindawi journal article supplement (doi:10.1155/2020/1828319), 2020-09-17
Supplement: f1 [file 1828319.f1.zip]

Archive with 2 entries (2 files):
- 1828319.f1/DB_Chirimachay_station.txt
- 1828319.f1/DB_Labrado_station.txt
