# Supplementary material for: Improved Rainfall Prediction through Nonlinear Autoregressive Network with Exogenous Variables: A Case Study in Andes High Mountain Region
Source: Hindawi journal article supplement (doi:10.1155/2020/1828319), 2020-09-17
Supplement: f1 [file 1828319.f1.zip › 1828319.f1/DB_Chirimachay_station.txt]

Year	Month	AMMSST	AMON_US	AO	BEST	CAR	GMSST	HURR	MEI	NAO	NINA1	NINA3	NINA34	NINA4	NP	NTA	ONI	PDO	PNA	QBO	SAHELRAIN	SOI	SOLAR	TNA	TNI	TSA	WHWP	WP	Rain
1963	Jan	3.15	0.157	-3.311	-0.47	0.08	-3	0	-0.718	-2.98	23.72	24.85	25.77	27.45	1002.47	0.32	-0.4	-0.33	0.09	-17.35	-2	1.7	795	0.56	-0.127	-0.05	-0.17	-3.28	
1963	Feb	3.07	0.166	-1.721	-0.29	0.14	20	0	-0.837	-1.53	25.28	25.79	26.22	27.48	1002.31	0.27	-0.15	-0.16	0.79	-16.68	11	0.9	797	0.51	-0.111	0.01	-0.3	-2.32	
1963	Mar	1.42	0.134	0.724	-0.27	0.19	-13	0	-0.675	-0.85	25.73	26.91	27.18	27.98	1017.38	0.18	0.15	-0.54	-2.04	-19.93	-7	1.9	778	0.34	0.063	0.27	-0.09	-0.93	
1963	Apr	1.76	0.104	-0.348	-0.14	0.17	-5	0	-0.761	-1.61	24.32	27.43	27.78	28.29	1017.52	0.01	0.27	-0.41	-0.79	-21.52	57	1.3	795	0.42	0.003	0.21	0.42	0.96	
1963	May	-0.21	-0.085	0.771	0.09	0.06	-9	0	-0.473	2.05	23.85	26.97	27.63	28.4	1015.84	-0.12	0.31	-0.65	-0.95	-24.18	14	0.6	878	0.14	-0.1	0.42	-0.01	2.03	
1963	Jun	-1.12	-0.047	-0.585	0.63	-0.05	3	0	-0.144	-0.13	22.25	26.58	27.62	28.32	1016.34	-0.24	0.52	-0.88	0.5	-20.08	4	-0.8	835	0.11	-0.251	0.45	0.45	2.72	
1963	Jul	-1.14	-0.036	-0.303	0.81	-0.07	8	0	0.404	-0.74	21.61	26.24	27.78	28.62	1018.47	-0.28	0.86	-1	-1.1	-9.27	48	-0.2	759	0.17	-0.173	0.43	-0.27	1.99	
1963	Aug	-2.04	-0.073	-0.625	0.88	-0.05	25	9.75	0.59	-0.95	21.16	25.68	27.48	28.79	1016.3	-0.31	1.14	-1.03	-1.01	-1.35	254	0	809	0.13	-0.367	0.45	2.49	0.96	
1963	Sep	-3.19	-0.202	0.083	0.83	-0.04	20	7	0.734	1.89	20.78	25.36	27.4	29	1010.69	-0.33	1.22	0.45	0.87	3.52	85	-1	851	-0.04	-0.625	0.41	2.04	-0.12	
1963	Oct	-2.34	-0.072	1.069	1.19	-0.03	16	20.5	0.805	1.53	20.96	25.41	27.36	28.99	1012.35	-0.29	1.29	-0.52	0.93	7.54	385	-2	851	-0.03	-0.722	0.45	1.78	1.47	
1963	Nov	-2.21	-0.057	-0.419	0.86	-0.06	16	0	0.837	-1.47	21.44	25.66	27.47	28.7	1011.29	-0.29	1.37	-2.08	-0.31	8.87	-9	-1.4	817	0.17	-0.93	0.69	1.92	-1.45	
1963	Dec	-2.96	-0.06	-1.178	1.21	-0.06	0	0	0.765	-1.87	22.52	25.98	27.62	28.54	1003.24	-0.23	1.31	-1.08	1.46	5.48	-5	-2	784	0.04	-1.273	0.77	-0.09	0.02	
1964	Jan	-1.59	-0.075	0.385	0.67	-0.03	-6	0	0.878	-1.62	23.92	26.02	27.34	28.41	1006.28	-0.18	1.07	0.01	-0.44	3.94	-4	-0.6	754	0.09	-1.342	0.65	-0.08	-0.16	35.7
1964	Feb	0.21	0.021	-0.575	0.4	0.05	-12	0	0.481	-2.06	24.81	26.31	27.13	28.05	1010.02	-0.07	0.62	-0.21	1.36	5.26	-8	0.1	768	0.28	-1.304	0.31	-0.14	0.01	70.9
1964	Mar	0.74	0.039	-0.558	-0.36	0.1	-22	0	-0.256	-1.66	25.08	26.72	27.02	27.68	1014.55	-0.13	0.12	-0.87	-1.31	5.46	6	1.9	759	0.29	-1.543	0.33	0.03	-0.29	77
1964	Apr	0.17	-0.146	0.663	-1	0.17	-30	0	-0.545	0.25	24.18	26.19	26.95	28.02	1019.47	-0.16	-0.33	-1.03	-1.3	5.94	1	1.8	726	-0.13	-1.424	0.06	-0.45	1.99	178.2
1964	May	1.5	0.04	1.174	-0.45	0.13	-25	0	-1.234	0.53	21.74	25.42	26.82	28.21	1020.82	-0.19	-0.58	-1.91	-2.27	6.32	92	0.4	695	0.08	-1.178	-0.22	-1.13	0.19	102.5
1964	Jun	1.34	0.004	0.142	-0.91	0.08	-7	0	-1.15	1.61	21.24	24.99	26.59	27.94	1013.77	-0.18	-0.58	-0.32	0.27	2.23	206	1.2	690	0.07	-0.993	-0.14	-0.85	-0.88	154.8
1964	Jul	0.25	-0.144	0.734	-0.64	-0.03	-7	0	-1.384	1.92	20.19	24.69	26.33	27.79	1016.53	-0.29	-0.6	-0.51	0.2	-0.56	311	0.9	670	-0.06	-0.526	-0.2	-0.46	1.86	52.2
1964	Aug	0.09	-0.234	-1.207	-1.13	-0.07	-21	6.5	-1.486	-2.4	19.34	23.55	25.6	27.41	1016.02	-0.47	-0.66	-1.03	0.83	-0.57	542	2.5	693	-0.2	0.019	-0.21	-1.09	1.23	116.8
1964	Sep	0.34	-0.22	-0.227	-1.15	-0.1	-28	30.5	-1.309	0.34	19.5	23.74	25.32	27.05	1015.03	-0.53	-0.76	-0.68	0.92	-0.67	269	2.1	702	-0.26	0.473	-0.68	-1.03	0.46	164.2
1964	Oct	0.28	-0.271	0.342	-1.17	-0.09	-30	6	-1.216	1.32	19.58	23.76	25.37	27.14	1014.25	-0.51	-0.8	-0.37	0.8	0.42	-91	2.2	734	-0.25	0.781	-0.79	-1.43	1.41	51.3
1964	Nov	0.95	-0.166	-0.344	-0.52	-0.13	-21	0	-1.229	-0.14	20.69	23.92	25.26	26.95	1012.16	-0.48	-0.82	-0.8	-0.78	0.71	-7	0.3	737	-0.09	0.909	-0.63	-1.37	-0.79	85.9
1964	Dec	1.08	-0.121	-0.246	-0.27	-0.16	-30	0	-0.907	-0.23	21.48	23.73	25.23	26.94	1010.71	-0.49	-0.78	-1.52	-2.03	0.04	54	-0.5	788	-0.19	0.879	-0.76	-0.32	-0.43	81
1965	Jan	-0.62	-0.199	-1.046	-0.03	-0.17	-9	0	-0.536	-0.65	23.87	24.7	25.66	27.23	1005.68	-0.5	-0.59	-1.24	-0.92	-1.03	21	-0.7	786	-0.36	1.119	-0.39	-0.17	-1	85.7
1965	Feb	-1.26	-0.177	-2.084	-0.22	-0.18	-17	0	-0.329	-2.2	25.78	25.86	26.19	27.44	1010	-0.43	-0.28	-1.16	-1.03	-2.26	6	0.7	752	-0.25	1.393	-0.08	-0.3	-1.04	57.4
1965	Mar	-1.02	-0.078	-0.905	-0.3	-0.14	-11	0	-0.259	-1.99	26.48	26.93	26.94	27.57	1010.87	-0.37	-0.07	0.04	-0.8	-1.98	-19	1.2	741	-0.13	1.838	0.11	-0.64	-1.17	92.5
1965	Apr	-1.4	-0.097	0.568	0.52	-0.19	-19	0	0.086	0.64	26.88	27.47	27.38	27.71	1015.95	-0.37	0.18	0.62	-1.07	-3.44	-47	-0.9	720	-0.18	2.175	0.1	0.18	0.49	219.4
1965	May	-1.84	-0.099	-0.153	0.31	-0.21	-14	0	0.464	-0.52	25.95	27.56	27.99	28.5	1016.29	-0.46	0.46	-0.66	-0.42	-7.1	-25	0.3	782	-0.21	2.209	0.15	0.37	1.18	159
1965	Jun	-2.26	-0.127	0.038	1.03	-0.27	-8	0	0.867	0.6	24.35	27.09	28.09	28.88	1014.16	-0.47	0.83	-0.8	1.89	-12.01	242	-0.9	770	-0.28	2.019	-0.17	-1.63	1.19	108.6
1965	Jul	-1.51	-0.188	-0.51	1.9	-0.27	-12	0	1.367	0.35	23	26.51	27.9	28.91	1017.4	-0.51	1.22	-0.47	-1.26	-16	-10	-3	743	-0.2	1.484	-0.39	-0.62	2.64	79.9
1965	Aug	-2.35	-0.21	-0.255	1.55	-0.24	-1	4.25	1.425	0.45	22.38	26.13	27.97	28.91	1015.65	-0.52	1.54	0.2	0.32	-18.19	475	-1.1	748	-0.2	0.758	-0.21	-1.12	1.62	83
1965	Sep	-2.66	-0.222	-0.698	1.63	-0.18	-15	20	1.379	0.51	21.1	25.98	28.01	28.88	1014.99	-0.51	1.85	0.59	0.36	-20.03	396	-2.2	766	-0.12	0.214	-0.03	-0.57	-1.29	119.9
1965	Oct	-2.64	-0.248	0.394	1.54	-0.09	-4	3	1.202	0.92	21.34	26.09	28.17	29.28	1011.97	-0.45	1.98	-0.36	1.42	-20.13	26	-1.5	802	-0.1	-0.107	-0.17	0.68	1.57	119.3
1965	Nov	-2.32	-0.277	-1.341	1.91	-0.01	-6	0	1.343	-1.88	22.09	26.38	28.12	29.1	1013.94	-0.34	1.97	-0.59	-0.81	-19.74	11	-2.4	777	-0.09	-0.336	-0.3	0.68	1.56	139.1
1965	Dec	-1.35	-0.124	0.163	0.79	0.01	-5	0	1.27	1.18	23.16	26.45	27.96	28.87	1013.28	-0.24	1.72	0.06	-1.56	-21.27	-5	0.3	778	0.01	-0.56	-0.25	0.32	0.38	84.8
1966	Jan	-0.35	-0.076	-3.232	1.22	0	-16	0	1.307	-2.54	24.94	26.69	27.67	28.7	1004.24	-0.02	1.37	-0.82	-0.15	-21.9	-6	-2.2	879	-0.02	-1.127	-0.19	0.16	0.42	119.7
1966	Feb	2.12	0.01	-1.438	0.78	-0.05	0	0	1.186	-2.02	25.49	26.9	27.55	28.64	1012.75	0.17	1.17	-0.03	-2.05	-17.14	-8	-0.4	842	0.37	-1.485	-0.28	0.06	0.73	108.7
1966	Mar	3.01	-0.01	-0.911	1.31	-0.06	4	0	0.689	0.18	25.02	27.18	28.21	29.08	1012.16	0.34	0.98	-1.29	0.43	-11.07	8	-1.5	903	0.43	-1.806	-0.39	0.31	-0.76	119.8
1966	Apr	3.3	0.043	-1.837	0.89	-0.1	-13	0	0.515	-0.96	23.97	27.3	28.16	28.8	1015.58	0.26	0.66	0.06	-0.54	-2.33	29	-0.3	972	0.52	-2.177	0.08	0.3	0.08	98.1
1966	May	2.26	0.001	1.124	0.43	-0.18	-10	0	-0.178	0.25	22.69	26.2	27.55	28.86	1016.23	0.13	0.35	-0.53	-0.15	2.16	33	-0.7	985	0.36	-2.362	0.13	-0.86	0.51	90.8
1966	Jun	0.82	-0.045	0.408	0.18	-0.24	1	4	-0.193	1.37	21.57	25.89	27.64	28.93	1014.01	-0.02	0.24	0.16	0.1	5.42	157	0.5	963	0.27	-2.009	0.62	-1.19	-1.03	74.3
1966	Jul	0.39	-0.056	0.011	0.44	-0.25	8	6	-0.116	0.35	20.67	25.26	27.33	28.98	1017.62	-0.13	0.24	0.26	-1.18	7.47	-255	0.1	1067	0.15	-1.867	0.28	-0.22	2.82	90
1966	Aug	0.3	-0.044	-0.945	-0.13	-0.14	-11	8.5	0.152	-2.39	19.83	24.35	26.48	28.58	1016.28	-0.18	0.12	-0.35	1.26	7.63	15	1.1	1066	0.03	-1.699	-0.06	0.44	-0.34	69.8
1966	Sep	0.45	0	0.011	0.18	-0.07	-1	10	-0.094	-0.29	19.83	24	26.27	28.57	1010.33	-0.25	-0.05	-0.33	0.63	9.23	538	-0.4	1109	0.07	-1.408	-0.07	0.76	0.55	79.4
1966	Oct	0.11	0.013	-1.077	0.14	-0.09	-15	9.25	-0.05	-0.23	20.44	24.24	26.22	28.68	1014.31	-0.18	-0.1	-1.17	-0.61	11	400	-0.2	1086	0.1	-1.178	-0.05	0.45	-0.96	79.6
1966	Nov	0.33	0.003	0.111	-0.07	-0.15	-2	4	-0.003	-0.18	20.74	24.11	26.23	28.64	1015.43	-0.14	-0.18	-1.15	-1.96	11.74	-4	0	1133	0.35	-0.774	0.21	1.14	0.95	79.3
1966	Dec	0.09	0.08	-1.401	0.2	-0.25	-6	0	-0.181	0.58	22.19	24.13	26.03	28.21	1006.73	-0.02	-0.3	-0.32	-0.21	13.26	-1	-0.6	1246	0.24	-0.224	0.6	-0.32	-1.34	76
1967	Jan	0.84	0.081	-0.576	-0.91	-0.25	-6	0	-0.462	-1.55	23.53	24.93	25.88	27.6	1008.04	-0.1	-0.41	-0.2	-1.16	11.03	-5	2.8	1477	0.24	-0.079	0.3	-0.17	0.86	135.5
1967	Feb	0.1	0.087	1.18	-0.95	-0.19	-20	0	-0.898	-0.23	25.52	25.91	26.11	27.41	1008.75	-0.18	-0.48	-0.18	-0.2	10.49	1	2.8	1470	0	-0.022	0.3	-0.27	0	127.1
1967	Mar	0.2	-0.034	1.967	-0.55	-0.11	4	0	-1.05	1.18	25.44	26.3	26.5	27.82	1015.84	-0.24	-0.53	-1.2	-2.25	10.94	22	2	1606	-0.15	-0.14	-0.03	-0.78	0.02	91.5
1967	Apr	1.3	-0.016	1.7	-0.29	-0.1	-4	0	-1.03	0.05	24.82	26.35	26.74	28.44	1020.99	-0.32	-0.45	-0.89	-1.91	10.13	17	-0.1	1299	0.05	-0.461	-0.2	-1.11	1.51	104.5
1967	May	0.84	-0.187	0.127	0.15	-0.18	14	0	-0.448	-0.87	23.6	26.59	27.35	28.76	1018.42	-0.38	-0.24	-1.24	-0.8	5.79	-45	0	1430	-0.16	-0.974	-0.37	-1.47	-1.38	97.8
1967	Jun	0.01	-0.261	0.647	-0.23	-0.29	-8	0	-0.236	1.72	22.07	26.24	27.47	28.58	1014.38	-0.47	0	-1.16	-0.33	-0.58	32	1.1	1202	-0.21	-1.254	-0.61	-1.93	-0.4	135.1
1967	Jul	0.43	-0.231	0.259	0.02	-0.35	1	0	-0.492	0.44	20.86	25.11	26.97	28.52	1019.02	-0.48	0.05	-0.89	-1.24	-5.65	138	0.3	1403	-0.2	-1.449	-0.62	-1.98	0.31	157.1
1967	Aug	0.08	-0.165	-0.293	-0.4	-0.36	2	0	-0.391	1.73	19.51	24.13	26.44	28.32	1014.02	-0.45	-0.16	-1.24	-0.35	-6.76	430	1.2	1537	-0.3	-1.543	-0.4	-2.72	0.15	123.5
1967	Sep	0.18	-0.097	0.133	-0.5	-0.27	-4	28.25	-0.627	1.05	18.92	23.51	25.86	28.2	1010.17	-0.44	-0.3	-0.72	0.11	-6.06	448	0.8	1321	-0.14	-1.674	-0.35	-1.34	0.01	60
1967	Oct	-0.43	-0.1	1.299	-0.12	-0.2	7	8	-0.677	0.59	19.29	23.62	25.97	28.33	1010.3	-0.47	-0.38	-0.64	1.1	-4.82	118	0.1	1361	-0.14	-1.722	-0.61	-0.33	-0.8	164.3
1967	Nov	-1.82	-0.235	0.334	0.14	-0.11	-6	0	-0.424	0.5	19.88	23.89	26.08	28.34	1012.61	-0.52	-0.34	-0.05	-0.35	-6.05	16	-0.7	1453	-0.33	-1.619	-0.4	-0.23	-0.59	63.3
1967	Dec	-2.17	-0.153	-0.347	0.24	-0.12	-2	0	-0.357	-0.51	20.97	23.99	25.95	28.15	1010.04	-0.53	-0.44	-0.4	-1.12	-7.27	-2	-0.9	1630	-0.23	-1.545	-0.13	-0.29	-0.56	33.6
1968	Jan	-0.99	-0.247	-0.409	-0.47	-0.13	-23	0	-0.602	-0.36	22.95	24.26	25.69	27.86	1010.08	-0.42	-0.64	-0.95	-1.78	-8.38	-5	0.9	1891	-0.3	-1.335	-0.03	-0.17	-2.08	112.7
1968	Feb	0.68	-0.199	-2.154	-0.82	-0.19	-15	0	-0.727	-1.91	24.7	24.83	25.68	27.73	1000.05	-0.29	-0.74	-0.4	1.11	-10.21	57	2.1	1732	-0.11	-1.172	-0.24	-0.3	-3.18	107.8
1968	Mar	0.67	-0.209	1.741	-0.27	-0.18	21	0	-0.635	0.02	24.91	25.76	26.33	27.75	1012.31	-0.24	-0.62	-0.31	0.13	-9.11	26	0.2	1426	-0.06	-1.108	-0.26	-0.96	-0.04	203.5
1968	Apr	-0.07	-0.156	0.328	-0.19	-0.16	-5	0	-0.944	-1.32	23.77	26.49	27.1	28.17	1017.29	-0.31	-0.44	-1.03	-1.11	-12.25	149	0	1295	-0.11	-1.245	-0.01	-2.59	-0.91	73.7
1968	May	-0.14	-0.124	-0.241	-0.81	-0.17	-10	0	-1.093	-1.58	22.39	26.04	27.19	28.32	1016.17	-0.52	-0.04	-0.53	0.23	-14.39	72	2.1	1549	-0.09	-1.197	-0.01	-2.47	-0.93	82.9
1968	Jun	-1.45	-0.263	0.42	-0.16	-0.23	-6	2.25	-0.812	0.64	21.51	26.19	27.88	28.88	1016.22	-0.62	0.28	-0.35	-0.08	-19.27	63	1.8	1423	-0.25	-1.07	0.08	-2.24	-1.19	125.7
1968	Jul	-1.79	-0.23	-0.836	0.08	-0.22	-11	0	-0.503	-0.77	21.15	25.88	27.58	28.55	1015.89	-0.64	0.58	0.53	-0.04	-21	17	1.1	1372	-0.19	-0.69	0.24	-0.93	1.18	148.9
1968	Aug	-1.9	-0.214	-0.671	0.35	-0.12	-11	2.75	-0.104	-0.97	20.75	25.15	27.01	28.58	1015.24	-0.56	0.53	0.19	1.3	-21.82	-331	0.4	1422	-0.14	-0.534	0.2	-0.01	0.64	79.3
1968	Sep	-1.62	-0.151	-1.009	0.3	-0.01	-18	1.75	0.213	-1.73	21.05	24.82	26.72	28.57	1015.92	-0.44	0.45	0.06	-0.87	-17.45	-27	-0.4	1410	-0.07	-0.441	0.29	1.24	-0.72	77.3
1968	Oct	-1.44	-0.114	-1.013	0.37	0.05	12	5	0.424	-1.99	20.87	24.96	26.75	28.69	1010.72	-0.3	0.55	-0.34	0.45	-14.58	-4	-0.1	1525	0.09	-0.398	0.44	0.64	0.97	160.2
1968	Nov	-1.13	-0.109	-2.183	0.65	0.05	-4	0	0.582	-1.11	21.56	25.15	27.2	29.1	1006.37	-0.17	0.73	-0.44	0.83	-13.11	15	-0.6	1385	0.17	-0.785	0.49	0.77	-0.97	69.2
1968	Dec	-0.68	-0.128	-0.783	0.39	0.05	-14	0	0.367	-1.39	22.97	25.62	27.27	29.16	1013.57	0.01	0.98	-1.27	-1.74	-11.36	8	0.3	1484	0.28	-1.508	0.5	-0.14	0.64	30.4
1969	Jan	1.11	-0.064	-2.967	1.11	0.01	-11	0	0.67	-1.48	24.36	26.11	27.5	29.24	1012.41	0.22	1.13	-1.26	-2.96	-8.58	-3	-2.4	1527	0.43	-1.509	0.32	-0.09	-0.71	81.1
1969	Feb	2.86	0.104	-3.114	1.06	-0.01	-14	0	0.849	-2.2	25.35	26.72	27.86	29.28	1008.91	0.55	1.09	-0.95	-1.97	-4.43	-6	-0.9	1552	0.74	-1.156	0.53	-0.01	0.61	115.6
1969	Mar	5.19	0.206	-1.582	0.48	0.05	0	0	0.458	-2.04	26.83	27.42	27.82	28.95	1012.89	0.68	0.95	-0.5	0.47	-1.5	15	0.7	1723	1.13	-0.713	0.38	2.04	0.56	125.7
1969	Apr	3.83	0.148	0.438	0.71	0.11	19	0	0.622	1.52	26.41	27.76	28.13	29.03	1012.34	0.68	0.77	-0.44	0.48	3.98	-3	-0.6	1555	0.84	0.053	0.35	2.09	1.58	217.2
1969	May	3.17	0.01	-0.72	0.87	0.13	20	0	0.674	0.56	25.73	27.71	28.29	29.25	1012.72	0.45	0.61	-0.2	1.02	8.18	-26	-0.4	1454	0.73	0.623	0.2	4.28	1.65	79.9
1969	Jun	1.89	0.027	-0.348	0.4	0.12	5	0	0.801	0.86	24.09	26.85	27.69	28.93	1013.23	0.31	0.43	0.89	2.11	9.35	7	0.3	1622	0.37	0.491	-0.05	4.3	1.37	146.2
1969	Jul	1.61	0.093	0.41	0.59	0.11	-2	0	0.49	0.6	22.24	25.71	27.08	28.73	1018.99	0.17	0.36	0.1	0.51	9.08	309	-0.8	1366	0.39	0.191	-0.15	4.67	-0.61	74.3
1969	Aug	0.54	-0.102	-0.782	0.72	0.14	3	13	0.212	-1.99	20.88	25.36	27.02	28.92	1016.86	0.11	0.51	-0.81	-0.69	9.78	235	-0.2	1430	0.34	-0.1	0.01	1.95	-2.18	124.6
1969	Sep	-0.26	-0.108	-0.083	0.94	0.1	10	9	0.162	2.17	20.75	25.36	27.15	29.16	1012.16	0.04	0.79	-0.66	1.31	9.74	166	-1.6	1373	0.27	-0.463	-0.09	2.49	0.25	99
1969	Oct	-0.52	-0.186	0.098	1.04	0.1	11	15.75	0.496	1.23	21.62	25.52	27.34	29.32	1010.56	0.08	0.86	1.12	0.55	9.75	382	-1.5	1540	0.17	-0.5	-0.06	1.3	0.32	101.1
1969	Nov	0.52	-0.125	0.326	0.5	0.04	12	2.5	0.659	-1.14	22.23	25.62	27.1	29.19	1010.41	0.13	0.81	0.15	0.13	7.34	18	-0.1	1567	0.34	-0.302	-0.07	2.01	-0.36	165.9
1969	Dec	1.88	-0.032	-1.856	0.29	0.01	27	0	0.417	-0.35	23.4	25.87	26.98	28.93	1001.77	0.36	0.63	1.38	1.53	5	-2	0.7	1436	0.44	-0.348	-0.19	-0.19	0.57	150.5
1970	Jan	3.81	-0.011	-2.412	0.87	-0.04	10	0	0.38	-2.26	24.96	26.08	26.83	28.53	1005.97	0.45	0.51	0.61	0.12	0.3	-4	-1.9	1583	0.64	-0.773	-0.34	-0.17	-2.17	119.7
1970	Feb	4.2	-0.049	-1.325	0.83	-0.02	22	0	0.432	0.28	25.72	26.41	26.95	28.49	1002.61	0.59	0.34	0.43	1.01	-1.41	-8	-1.7	1754	0.64	-1.024	-0.26	-0.29	0.01	196.7
1970	Mar	5.33	0.018	-2.084	0.2	0.05	7	0	0.228	-1.41	25.23	26.83	27.14	28.33	1007.91	0.53	0.29	1.33	0.49	-4.63	-9	1	1584	0.83	-1.386	-0.2	-0.73	-0.29	132.5
1970	Apr	4.12	0.019	0.302	0.46	0.04	9	0	0.014	-1.56	24.55	27.04	27.74	28.58	1017.11	0.45	0.19	0.43	-0.66	-7.25	-35	-0.1	1620	0.68	-1.722	-0.28	-0.42	0.87	147.1
1970	May	3.58	-0.047	0.531	0.15	0	-5	0.5	-0.099	1.11	22.63	26.27	27.63	28.82	1016.85	0.25	0.04	-0.49	-0.5	-12.21	56	0.6	1684	0.51	-1.993	-0.19	-1.11	-0.15	138.4
1970	Jun	2.48	-0.183	0.875	-0.51	-0.12	-3	0	-0.636	1.87	21.12	25.16	27.04	28.62	1014.65	0.07	-0.3	0.06	0.23	-16.25	-195	1.6	1549	0.24	-1.865	-0.33	-1.08	-0.13	123.2
1970	Jul	1.2	-0.201	0.139	-0.36	-0.18	-4	0	-1.055	0.13	19.45	23.87	26.21	28.44	1016.1	-0.11	-0.63	-0.68	0.74	-18.62	143	-0.6	1520	-0.03	-1.723	-0.11	-1.25	1	109
1970	Aug	0.86	-0.141	-0.263	-0.81	-0.17	-11	2.25	-1.007	0	19.16	23.38	25.6	27.89	1016.81	-0.25	-0.76	-1.63	-0.6	-21.38	141	1	1382	-0.07	-1.283	-0.24	-0.55	1.01	111.3
1970	Sep	-0.02	-0.139	0.03	-0.98	-0.15	11	2	-1.251	0.06	19.29	23.63	25.65	27.65	1014.34	-0.27	-0.77	-1.67	-0.39	-21.67	68	1.9	1432	-0.12	-0.958	-0.22	-0.24	-1.5	101.7
1970	Oct	0.31	-0.197	0.098	-0.71	-0.12	4	2	-1.088	-0.49	19.88	23.71	25.6	27.59	1014.48	-0.25	-0.74	-1.39	-0.95	-22.12	-149	1.7	1483	-0.06	-0.276	-0.39	-0.13	1.4	167.8
1970	Nov	0.51	-0.241	0.378	-1.31	-0.14	1	0	-1.074	-0.76	20.48	23.62	25.57	27.57	1014.31	-0.21	-0.86	-0.8	-1.15	-22.48	1	2.6	1620	-0.02	0.231	-0.2	-0.22	0.5	124.8
1970	Dec	0.97	-0.21	-0.399	-1.36	-0.12	-13	0	-1.203	-1.2	21.66	23.91	25.27	27.04	1011.85	-0.13	-1.15	-0.97	-1.09	-17.39	-4	3.2	1528	0.03	0.454	-0.34	-0.32	0.57	101.3
1971	Jan	0.73	-0.246	-0.163	-0.83	-0.09	-2	0	-1.204	-1.82	23.13	24.08	24.81	26.65	1012.4	-0.12	-1.36	-1.9	-2.43	-10.67	-5	0.6	1626	0.1	0.566	-0.01	-0.17	-2.51	111.1
1971	Feb	-0.17	-0.293	-0.922	-1.5	-0.1	-20	0	-1.507	-0.17	24.42	24.84	25.18	26.81	1007.64	-0.2	-1.38	-1.74	-0.16	-3.67	2	3.3	1378	-0.03	0.862	0.02	-0.3	-1.65	170.8
1971	Mar	-1	-0.311	-1.091	-1.66	-0.2	-18	0	-1.79	-1.28	25.03	25.9	25.92	27.01	1011.21	-0.39	-1.12	-1.68	-0.28	0.91	20	3.8	1119	-0.18	0.691	-0.06	-0.96	-0.15	262.2
1971	Apr	-2.61	-0.414	-0.583	-1.69	-0.28	-9	0	-1.839	-0.41	24.87	26.54	26.63	27.46	1014.75	-0.57	-0.85	-1.59	0.23	3.75	9	2.8	1167	-0.34	0.4	0.09	-2.57	-0.08	94.6
1971	May	-3.56	-0.327	0.679	-1	-0.34	-7	0	-1.429	0.51	23.18	26.13	26.95	27.85	1014.25	-0.74	-0.73	-1.55	1.09	6.77	-56	1.4	1099	-0.46	0.397	0.25	-2.32	0.76	81.7
1971	Jun	-3.8	-0.364	-0.668	-0.67	-0.34	-18	0	-1.42	-1.28	21.58	25.38	26.6	27.83	1014.46	-0.78	-0.74	-1.55	0.51	8.28	-127	0.7	1017	-0.62	0.211	0.17	-1.95	1.64	120.6
1971	Jul	-1.96	-0.35	-0.578	-0.42	-0.38	-12	0	-1.207	0.27	20.93	24.68	26.13	27.69	1016.26	-0.75	-0.8	-2.2	-1.74	8.88	-61	0.4	1174	-0.45	0.1	-0.23	-1.54	0.77	103
1971	Aug	-2.47	-0.436	0.818	-1.1	-0.4	-4	3.25	-1.213	1.87	19.77	23.79	25.75	27.54	1015.26	-0.59	-0.77	-0.15	-0.81	8.34	276	2.5	1141	-0.46	0.097	-0.2	-2.97	-0.87	121.2
1971	Sep	-1.56	-0.367	0.153	-1.13	-0.33	-1	25.5	-1.467	0.53	19.51	23.86	25.72	27.3	1015.27	-0.47	-0.82	0.21	0.15	8.95	-6	2.3	1040	-0.29	0.145	-0.16	-3.97	-0.48	118.3
1971	Oct	-0.26	-0.236	1.185	-1.26	-0.24	-6	0	-1.415	1.14	19.72	23.65	25.47	27.44	1015.2	-0.36	-0.85	-0.22	-1.35	8.48	-153	2.8	1072	-0.18	0.087	-0.38	-3.38	0.86	119.3
1971	Nov	0.73	-0.244	0.419	-0.69	-0.15	-4	0	-1.311	-0.34	20.89	23.79	25.56	27.71	1011.73	-0.38	-0.96	-1.25	-0.26	8.47	-8	0.9	1140	-0.13	0.221	-0.68	-1.9	0.31	65.9
1971	Dec	-0.44	-0.309	0.824	-0.47	-0.09	-8	0	-0.969	0.47	21.82	23.75	25.37	27.86	1014.19	-0.4	-0.9	-1.87	-1.76	9.1	14	0.4	1245	-0.31	0.259	-0.79	-0.32	0.45	68.9
1972	Jan	-1.63	-0.318	0.167	-0.41	-0.06	-24	0	-0.575	-0.19	24.19	24.93	25.62	27.63	1012.72	-0.47	-0.71	-1.99	-2.46	8.2	1	0.8	1148	-0.27	0.447	-0.08	-0.13	-0.05	145.2
1972	Feb	-2.15	-0.381	-0.195	-0.47	-0.04	-17	0	-0.398	-0.08	26.55	25.88	26.3	27.89	1010.69	-0.54	-0.35	-1.83	-2.27	7.95	-2	1.8	1418	-0.38	0.575	-0.06	-0.3	-2.26	90
1972	Mar	-3.12	-0.44	-0.141	-0.2	-0.08	2	0	-0.256	0.35	27.07	26.91	27.09	28.16	1009.85	-0.58	0.06	-2.09	-0.1	7.35	4	1.1	1285	-0.5	0.661	-0.18	-0.57	-1.87	238.6
1972	Apr	-3.04	-0.327	1.007	0.44	-0.18	-1	0	-0.166	-0.38	26.17	27.58	27.89	28.74	1019.8	-0.67	0.41	-1.65	-1.95	6.22	32	-0.2	1129	-0.31	0.851	0.03	0.33	-0.01	111.3
1972	May	-3.32	-0.469	0.14	1.56	-0.39	-2	0	0.423	0.93	25.13	27.46	28.32	29.03	1014.76	-0.64	0.67	-1.57	0.21	-2.59	102	-2.6	1296	-0.46	1.134	-0.03	0.17	1.23	101.8
1972	Jun	-4.31	-0.489	-0.049	1.23	-0.52	4	1.5	0.966	1.19	24.9	27.23	28.18	29.07	1015.53	-0.62	0.92	-1.87	-0.15	-10.7	7	-0.9	1354	-0.35	1.52	0.09	-1.4	2.06	150.8
1972	Jul	-4.77	-0.376	-0.553	1.7	-0.51	3	0	1.826	0.21	23.99	27.01	28.14	29.03	1017.95	-0.58	1.13	-0.83	-1.13	-15.45	-319	-2.4	1220	-0.4	1.659	0.25	-0.64	-0.32	131.4
1972	Aug	-4.91	-0.384	-0.082	1.47	-0.35	18	3.5	1.8	1.57	23.38	26.74	27.95	28.75	1014.64	-0.58	1.37	0.25	-0.04	-19.28	-297	-0.8	1257	-0.44	1.642	0.26	-1.47	1.09	51.2
1972	Sep	-4.75	-0.303	-0.92	1.6	-0.2	3	1.25	1.522	0.03	21.96	26.33	27.95	28.87	1014.78	-0.5	1.58	0.17	0.13	-20.4	-293	-2.2	1136	-0.33	1.481	0.23	-1.21	-1.61	80.3
1972	Oct	-4.5	-0.287	0.392	1.59	-0.07	9	0	1.617	1.7	22.4	26.72	28.26	29.16	1014.9	-0.4	1.84	0.11	-1.49	-21.17	18	-1.5	1211	-0.08	1.186	0.29	1.55	0.51	41.8
1972	Nov	-4.93	-0.277	-0.38	1.18	0.03	3	0	1.704	0.43	23.03	27.09	28.61	29.23	1009.7	-0.4	2.09	0.57	0.53	-20.49	4	-0.6	1016	-0.09	0.6	0.44	0.87	0.19	187.9
1972	Dec	-6.82	-0.351	1.238	1.84	0.06	18	0	1.787	0.09	24.82	27.47	28.69	29.21	1010.73	-0.44	2.12	-0.33	-0.86	-16.78	4	-2.1	1029	-0.37	0.122	0.89	0.63	0.71	120.2
1973	Jan	-6.53	-0.374	1.232	1.06	0.06	27	0	1.723	-0.46	25.83	27.44	28.34	28.99	1008.32	-0.4	1.84	-0.46	-0.88	-4.4	-5	-0.5	1022	-0.31	-0.294	0.79	0.14	0.47	109.8
1973	Feb	-5.69	-0.394	0.786	1.39	0.08	30	0	1.515	0.52	26.26	27.2	27.95	28.59	1008.21	-0.34	1.25	-0.61	-0.14	0.08	-5	-2.3	987	-0.3	-0.675	0.72	0.05	1.12	106.1
1973	Mar	-4.97	-0.344	0.537	0.46	0.05	25	0	0.87	-0.09	25.91	27.29	27.55	28.33	1010.61	-0.25	0.54	-0.5	0.53	3.4	-9	1.2	1004	-0.32	-1.108	0.59	1.03	0.56	83.9
1973	Apr	-3.62	-0.265	-1.126	0.17	0.02	25	0	0.491	-0.73	24.43	26.75	27.24	28.25	1016.76	-0.2	-0.1	-0.69	0.11	6.28	-12	0.1	1050	-0.19	-1.22	0.76	0.2	1.33	163.1
1973	May	-2.54	-0.169	0.073	-0.45	-0.09	25	0	-0.099	-0.36	23.05	25.93	26.96	28.48	1014.43	-0.18	-0.54	-0.76	0.67	8.12	-14	0.7	970	0.04	-1.119	0.93	-0.25	0.71	137.6
1973	Jun	-2.47	-0.175	0.531	-1.07	-0.13	16	0	-0.758	0.7	21.51	25.21	26.55	28.15	1015.1	-0.18	-0.87	-0.97	1.01	8.63	-81	1.8	912	-0.07	-0.855	0.75	-1.07	-1.34	77.4
1973	Jul	-2.15	-0.104	0.27	-1.05	-0.19	9	2.5	-1.056	0.6	20.73	24.15	25.76	27.85	1017.62	-0.24	-1.11	-0.57	-0.26	6.94	-76	1	845	-0.05	-0.561	0.67	-0.57	0.42	127.5
1973	Aug	-2.06	-0.133	0.313	-1.4	-0.23	2	0.75	-1.334	-0.2	19.39	23.5	25.22	27.44	1017.82	-0.28	-1.28	-1.14	-0.95	5.86	-143	2.1	829	-0.16	-0.038	0.58	-1.11	0.06	124.2
1973	Sep	-2.02	-0.131	0.114	-1.46	-0.24	6	3.75	-1.734	-0.15	19.42	23.38	25.06	27.27	1014.26	-0.39	-1.45	-0.51	-0.27	5.51	-243	2	1056	-0.16	0.501	0.75	-0.72	0.06	137.2
1973	Oct	-2.4	-0.216	0.337	-1.33	-0.2	11	3	-1.66	-0.84	19.93	23.29	24.73	27.11	1014.8	-0.41	-1.71	-0.87	-0.74	5.2	-139	1.3	877	-0.26	1.149	0.67	-1.92	0.9	50.6
1973	Nov	-1.91	-0.209	0.002	-2.46	-0.24	6	0	-1.489	-1.11	20.54	23.28	24.33	26.77	1014.83	-0.38	-1.95	-1.81	-1.66	4.92	-11	4.3	815	-0.23	1.717	0.54	-1.47	0.29	91.1
1973	Dec	-1.17	-0.238	-0.181	-1.89	-0.31	-6	0	-1.826	0.21	21.67	23.37	24.33	26.5	1005.32	-0.35	-2.03	-0.76	0.23	2.31	0	3	842	-0.1	1.97	0.4	-0.29	0.43	110.8
1974	Jan	-1.49	-0.276	0.232	-1.96	-0.36	-15	0	-1.912	1.05	23.21	23.86	24.46	26.3	1006.61	-0.45	-1.84	-1.22	-1.54	-0.91	-5	4	831	-0.28	2.145	0.34	-0.17	-3.37	58.3
1974	Feb	-2.91	-0.284	-0.489	-1.66	-0.29	-28	0	-1.768	-0.6	24.72	25.07	25.1	26.72	1011.16	-0.67	-1.55	-1.65	-1.5	-1.31	-7	3.4	809	-0.51	2.129	0.14	-0.3	-0.78	140.5
1974	Mar	-4.81	-0.401	-0.746	-1.82	-0.24	-5	0	-1.743	-0.43	25.65	26.24	25.84	27.17	1007.38	-0.92	-1.23	-0.9	-1.1	-1.08	8	4	792	-0.73	1.962	0.15	-0.83	-1.26	117.4
1974	Apr	-6.31	-0.523	0.309	-1.23	-0.25	-10	0	-1.62	0.41	25.14	26.77	26.46	27.43	1014.53	-1.1	-1.03	-0.52	-0.73	-1.92	-27	1.6	861	-1.09	1.728	0.36	-0.78	-0.19	121
1974	May	-6.22	-0.5	-0.507	-1.18	-0.29	-1	0	-1.048	-0.17	24.21	26.36	26.64	27.77	1015.46	-1.12	-0.91	-0.28	-0.4	-7.58	-62	1.6	906	-0.89	1.702	0.49	-1.52	0.36	128.9
1974	Jun	-4.9	-0.447	-0.048	-0.58	-0.37	-5	0	-0.694	0.17	22.35	25.78	26.53	27.89	1015.98	-0.94	-0.77	-0.31	-1.36	-13.86	-117	0.7	863	-0.61	1.502	0.43	-1.7	-0.13	132.1
1974	Jul	-3.89	-0.515	0.39	-0.93	-0.42	-3	0	-0.75	-0.73	21.38	25.22	26.39	27.74	1017.06	-0.78	-0.53	-0.08	-0.09	-19.58	337	1.9	925	-0.5	1.229	0.58	-2.79	0.81	160.4
1974	Aug	-3.66	-0.468	-0.533	-0.47	-0.49	11	3.75	-0.664	-0.95	20.54	24.72	26.33	27.97	1014.59	-0.66	-0.37	0.27	0.9	-23.14	277	1.3	830	-0.39	0.89	0.42	-3.16	0.24	106.2
1974	Sep	-3.9	-0.506	-0.136	-0.7	-0.49	-13	10.5	-0.628	0.95	20.09	24.27	26.08	27.71	1014.35	-0.69	-0.41	0.44	0.35	-23.52	81	1.8	878	-0.5	0.825	0.14	-4.35	-0.4	169.2
1974	Oct	-3.46	-0.508	-1.024	-0.78	-0.46	-8	0	-1.05	1.04	19.81	23.95	25.78	27.53	1010.74	-0.68	-0.61	-0.1	0.93	-23.12	-53	1.5	976	-0.46	0.636	0.11	-3.61	-0.22	149.4
1974	Nov	-4.12	-0.426	-0.435	-0.26	-0.41	-7	0	-1.24	-0.7	20.65	24	25.61	27.55	1010.51	-0.69	-0.75	0.43	0.53	-22.48	2	-0.2	903	-0.51	0.479	0.25	-1.85	0.42	154.3
1974	Dec	-3.91	-0.361	0.556	-0.43	-0.38	-9	0	-0.886	1.3	21.35	24.19	25.63	27.42	1006.12	-0.53	-0.64	-0.12	0.38	-22.57	-4	0.3	811	-0.51	0.361	0.11	-0.17	-0.89	98.1
1975	Jan	-2.14	-0.273	1.595	0.11	-0.29	7	0	-0.522	0.17	23.41	25.12	26.09	27.61	1010.94	-0.49	-0.54	-0.84	-1.2	-16.7	-5	-0.8	775	-0.24	0.6	-0.13	-0.17	-0.46	102.1
1975	Feb	-2.4	-0.339	0.194	-0.43	-0.17	7	0	-0.576	-1.15	24.92	25.56	26.07	27.65	1008.16	-0.47	-0.57	-0.71	-0.51	-15.39	-6	1.3	742	-0.41	0.749	-0.19	-0.3	-0.77	159.2
1975	Mar	-3.01	-0.309	0.151	-0.84	-0.09	13	0	-0.85	-1.04	26.16	26.34	26.19	27.46	1014.4	-0.58	-0.65	-0.51	-0.81	-13.04	5	2.6	724	-0.49	0.855	-0.15	-0.34	-0.46	92.1
1975	Apr	-2.42	-0.345	0.409	-0.95	-0.07	5	0	-0.927	-1.89	25.53	27.01	26.86	27.63	1018.88	-0.73	-0.73	-1.3	-0.67	-5.12	0	1.9	707	-0.45	0.949	-0.11	-0.22	0.37	132.1
1975	May	-3.16	-0.388	-0.614	-0.96	-0.13	16	0	-0.838	-0.43	23.45	26.16	26.8	27.77	1014.54	-0.81	-0.83	-1.02	0.6	1.18	55	1.1	701	-0.7	1.337	0.04	-1.21	-0.45	174.7
1975	Jun	-2.9	-0.295	-0.323	-1.58	-0.2	-2	0	-1.148	-0.54	21.7	25.22	26.23	27.54	1016.58	-0.79	-0.98	-1.16	-0.31	4.47	-93	2.1	697	-0.4	1.461	0.17	-1.21	-0.61	176.4
1975	Jul	-1.17	-0.272	0.345	-1.83	-0.27	-3	1.25	-1.497	1.57	21.03	24.61	25.9	27.37	1015.8	-0.63	-1.13	-0.4	-1.53	7.41	514	3.1	772	-0.28	1.503	0.02	-2.55	1.59	166.2
1975	Aug	-0.55	-0.185	0.13	-1.76	-0.29	-20	2.75	-1.712	-0.46	20.06	24.04	25.33	27.03	1017.49	-0.57	-1.2	-1.07	-1.1	9.06	28	3.3	904	-0.15	1.734	-0.02	-3.6	0.32	132
1975	Sep	-1.13	-0.336	1.278	-1.9	-0.29	-3	13.75	-1.876	1.67	19.16	23.5	25.05	26.71	1016.45	-0.59	-1.37	-1.23	-0.23	10.25	236	3.4	796	-0.26	1.933	-0.24	-3.54	0.22	60.8
1975	Oct	-1.35	-0.354	0.138	-1.66	-0.3	-9	2.75	-1.978	-0.08	19.04	23.37	24.89	26.55	1013.76	-0.7	-1.43	-1.29	-0.65	10.65	-57	2.8	757	-0.3	1.983	-0.18	-3.14	0	198.7
1975	Nov	-1.67	-0.341	0.619	-1.36	-0.37	-16	0	-1.756	0.3	19.41	23.67	25.05	26.58	1012.44	-0.64	-1.55	-2.08	-0.63	11.27	3	1.9	808	-0.39	1.946	-0.03	-2.11	1.04	121.7
1975	Dec	-0.62	-0.322	1.29	-1.74	-0.49	-17	0	-1.732	-0.09	20.93	23.41	24.67	26.39	1007.02	-0.52	-1.65	-1.61	-0.16	10.95	0	3.5	746	-0.26	1.908	-0.34	-0.32	-1.01	65.8
1976	Jan	-0.02	-0.384	0.034	-1.42	-0.6	-1	0	-1.587	-0.8	23.45	23.76	24.54	26.58	1004.08	-0.49	-1.56	-1.14	-0.25	9.22	12	2.3	747	-0.3	1.725	-0.41	-0.17	-0.71	176.8
1976	Feb	-1.1	-0.441	1.656	-1.24	-0.57	-6	0	-1.366	0.61	25.46	25.3	25.49	26.89	1013.13	-0.63	-1.17	-1.85	-2.38	8.92	5	2.8	705	-0.48	1.727	-0.4	-0.3	-0.39	78.3
1976	Mar	-2.74	-0.493	0.587	-0.97	-0.45	-21	0	-1.213	0.38	25.96	26.53	26.46	27.34	1013.8	-0.72	-0.73	-0.96	-1.78	9.7	-7	2.9	767	-0.81	1.697	-0.48	-0.87	-0.06	83.9
1976	Apr	-2.43	-0.426	0.44	-0.35	-0.34	-10	0	-1.157	0.14	25.7	26.92	26.88	27.8	1015.31	-0.82	-0.47	-0.89	0.92	11.53	9	0.5	763	-0.66	1.813	-0.67	-1.11	0.92	232.2
1976	May	-2.81	-0.488	0.06	-0.57	-0.34	-23	0	-0.483	0.94	25.12	26.91	27.2	28.15	1014.5	-0.8	-0.28	-0.68	0.58	10.04	83	0.6	706	-0.79	2.058	-0.7	-1.04	1.19	101.1
1976	Jun	-2.12	-0.483	0.328	0.14	-0.35	-15	0	0.276	1.11	24.5	26.94	27.35	28.21	1015.76	-0.8	-0.05	-0.67	-1.32	2.78	30	0.4	706	-0.59	2.354	-0.6	-1.76	1.28	244.7
1976	Jul	0.02	-0.307	-0.325	0.86	-0.31	-12	0	0.633	-0.29	23.57	26.24	27.13	28.18	1015.07	-0.55	0.18	0.61	-0.12	-1.9	-106	-1.4	675	-0.37	2.206	-0.67	-2.34	2.35	180.7
1976	Aug	1.56	-0.185	0.559	0.89	-0.29	-18	14.5	0.654	2.34	22.26	25.87	26.98	28.17	1015.43	-0.31	0.35	1.28	-0.62	-4.89	-134	-1.3	748	0.07	1.881	-0.48	-2.23	1.22	89.6
1976	Sep	1.4	-0.193	-0.743	1.08	-0.29	-9	8.75	1.018	-1.11	21.55	25.72	27.02	28.26	1011.75	-0.15	0.62	0.82	-0.04	-6.19	50	-1.9	731	0.14	1.352	-0.32	-3.42	0.1	91.2
1976	Oct	0.82	-0.293	-0.804	0.45	-0.31	-26	2.25	0.927	0.42	21.52	25.89	27.46	28.73	1012.2	-0.18	0.81	1.11	0.91	-8.23	425	0.7	759	0.18	0.809	-0.35	0.21	-0.66	61.9
1976	Nov	-0.66	-0.416	-0.087	0.11	-0.27	-6	0	0.49	0.04	22.15	25.88	27.41	28.78	1007.68	-0.34	0.86	1.25	1.72	-8.89	44	1.2	729	0.04	0.303	-0.45	0.03	0.23	62.5
1976	Dec	-2.15	-0.432	-2.074	0.6	-0.22	9	0	0.565	-1.57	23.2	25.89	27.09	28.29	1005.06	-0.4	0.85	1.22	0.21	-11.85	12	-0.6	767	-0.31	0.066	-0.21	-0.25	-1.11	98.6
1977	Jan	-1.98	-0.389	-3.767	0.65	-0.18	18	0	0.529	-1.72	24.8	26.54	27.32	28.22	999.02	-0.47	0.71	1.65	1.6	-14.44	3	-0.7	774	-0.15	-0.164	-0.19	-0.14	-1.08	138.9
1977	Feb	-1.57	-0.333	-2.01	-0.01	-0.11	20	0	0.29	-1	25.72	26.96	27.13	28.05	1001.18	-0.39	0.64	1.11	2.43	-14.9	-8	2	823	-0.22	-0.266	0	-0.16	0.08	139.5
1977	Mar	-0.83	-0.183	0.344	0.78	-0.08	25	0	0.145	-1.25	26.02	27.42	27.47	28.09	1016.83	-0.32	0.34	0.72	-0.69	-17.61	-9	-0.9	766	-0.11	-0.445	0	-0.58	1.83	132.4
1977	Apr	-0.31	-0.217	1.329	0.33	-0.09	27	0	0.552	0.56	24.95	26.94	27.44	28.39	1016.83	-0.25	0.23	0.3	-0.32	-14.93	-54	-0.7	776	-0.09	-0.657	-0.03	-1.16	0.97	85.8
1977	May	-0.08	-0.17	0.104	0.72	-0.17	30	0	0.31	-0.75	23.49	26.87	27.72	28.56	1015.61	-0.23	0.21	0.31	-0.56	-17.14	-17	-0.8	796	-0.07	-0.907	-0.05	-0.94	-0.43	55.2
1977	Jun	0.03	-0.107	-0.226	1.2	-0.18	25	0	0.414	-0.27	22.52	26.43	27.74	28.8	1015.16	-0.34	0.34	0.42	0.57	-21.33	-93	-1.5	915	0.05	-1.185	-0.09	-1.62	0.17	46.5
1977	Jul	-0.85	-0.105	-0.492	1.23	-0.22	23	0	0.888	-0.42	21.46	25.57	27.38	28.84	1017.82	-0.41	0.35	0.19	-1.04	-18.17	-96	-1.9	811	-0.14	-1.527	-0.14	-0.62	0.96	34.9
1977	Aug	-1.73	-0.145	-1.412	0.85	-0.22	19	1.25	0.684	-0.49	20.1	24.73	26.85	28.71	1014.03	-0.5	0.42	0.64	2.2	-11.24	-202	-1.3	843	-0.28	-1.733	0.01	-1.98	0.77	44.2
1977	Sep	-2.02	-0.232	0.586	0.86	-0.26	2	4.5	0.783	0.51	19.61	24.87	27.12	28.95	1016.62	-0.52	0.57	-0.55	-0.72	-5.09	59	-1.3	999	-0.24	-1.947	0.03	-1.33	2.13	112.9
1977	Oct	-2.41	-0.224	-0.009	1.2	-0.18	4	1	0.97	1.08	20.54	25.25	27.35	29.04	1011.43	-0.45	0.73	-0.61	1.25	-1.81	-88	-1.7	969	-0.24	-2.106	-0.09	-0.66	1.67	78
1977	Nov	-2.4	-0.142	0.605	1.33	-0.1	20	0	0.962	-0.21	21.19	25.3	27.19	29.02	1012.48	-0.42	0.81	-0.72	-0.22	-0.26	-24	-2.1	937	-0.26	-1.913	-0.08	-0.5	-0.27	40.8
1977	Dec	-1.95	-0.204	-0.24	1.18	-0.05	4	0	0.877	-1.02	22.26	25.48	27.29	28.95	1010	-0.26	0.79	-0.69	-0.8	1.69	-2	-1.7	1021	-0.15	-1.636	-0.07	0.01	-0.67	135.2
1978	Jan	0.23	-0.105	-0.347	0.63	-0.08	7	0	0.777	0.26	24.15	25.79	27.17	28.72	1000.57	-0.14	0.69	0.34	0.13	3.21	-3	-0.5	1096	0.11	-1.571	-0.19	-0.16	-0.01	72.7
1978	Feb	2	-0.147	-3.014	1.64	-0.11	14	0	0.912	-2.94	25.7	26.41	27	28.39	1000.56	-0.02	0.42	1.45	1.4	6.07	-3	-4.4	1454	0.2	-1.284	-0.29	-0.22	-0.15	57.1
1978	Mar	3.2	-0.158	0.502	0.4	-0.09	20	0	0.935	0.33	25.28	26.75	27.09	28.18	1008.85	0.03	0.06	1.34	-0.18	9.34	31	-0.3	1418	0.25	-1	-0.45	-0.63	-1.26	161.1
1978	Apr	3.8	-0.194	-0.967	0.11	-0.03	15	0	0.199	-1.42	24.76	26.64	27.12	28.04	1013.99	-0.04	-0.18	1.29	-0.19	12.98	168	-0.5	1494	0.26	-0.984	-0.65	-0.76	0.18	196.4
1978	May	2.05	-0.203	0.059	-1	-0.08	6	0	-0.378	1.05	23.17	26.1	27.2	28.52	1017.65	-0.15	-0.31	0.9	-0.73	12.23	60	2.2	1465	0.08	-0.905	-0.64	-1.03	-0.04	216.8
1978	Jun	-0.39	-0.332	0.635	-0.43	-0.15	-3	0	-0.605	1.7	21.94	25.65	27.02	28.41	1018.11	-0.33	-0.29	0.15	-0.92	8.36	67	1.1	1422	-0.14	-0.786	-0.47	-0.56	3.39	135.9
1978	Jul	-1.32	-0.276	-0.604	-0.45	-0.22	7	0	-0.42	-1.11	21.02	24.95	26.74	28.28	1017.46	-0.43	-0.36	-1.24	-2.43	6.02	248	0.9	1311	-0.33	-0.732	-0.08	-1.31	2.46	118.5
1978	Aug	-0.54	-0.226	-0.354	-0.48	-0.18	-18	1.5	-0.199	0.7	19.63	24.1	26.07	28.2	1015.19	-0.47	-0.42	-0.56	0.02	5.84	-108	0.7	1140	-0.33	-0.616	-0.2	-2.03	0.66	78.6
1978	Sep	0.17	-0.189	-0.099	-0.34	-0.16	5	10.75	-0.391	0.6	19.84	24.18	26.01	28.28	1013.89	-0.41	-0.42	-0.44	1.38	5.91	106	0.1	1579	-0.21	-0.349	-0.35	-2.55	0.92	186.9
1978	Oct	0.51	-0.207	0.895	0.16	-0.07	0	1.25	-0.028	2.61	20.06	24.57	26.25	28.2	1012.25	-0.31	-0.29	0.1	0.69	6.22	105	-0.6	1582	0.08	-0.085	-0.38	-1.54	-0.76	58.4
1978	Nov	0.05	-0.119	2.47	0.07	-0.01	16	0	0.175	3.06	21.61	24.79	26.33	28.31	1011.24	-0.27	-0.08	-0.07	-0.48	4.04	17	0	1515	0.01	0.022	-0.43	-1.31	0.1	50.6
1978	Dec	-1.09	-0.182	-0.98	0.18	-0.01	11	0	0.406	-1.54	22.9	25.24	26.54	28.37	1012.85	-0.14	0	-0.43	-1.02	1.46	8	-0.1	1755	-0.19	-0.188	-0.16	-0.1	1.3	88.1
1979	Jan	1.15	-0.192	-2.233	0.26	-0.07	14	0	0.608	-2.12	24.72	25.34	26.41	28.36	1006.27	-0.01	0.03	-0.58	-1.54	1.86	16	-0.7	2030	0.17	-0.343	-0.16	-0.17	1.43	23.5
1979	Feb	2.5	-0.15	-0.697	-0.25	-0.17	-9	0	0.379	-1.2	25.52	26.12	26.53	28.09	1014.25	0.11	0.07	-1.33	-2.73	4.12	-8	1.6	2041	0.28	-0.309	-0.24	-0.23	-0.66	37.7
1979	Mar	2.37	-0.227	-0.814	0.32	-0.19	19	0	0.002	0.41	25.91	27.15	27.27	28.3	1008.15	0.14	0.2	0.3	0.08	0.89	2	0.2	1858	0.15	-0.347	-0.31	-0.73	-0.29	174.4
1979	Apr	2.16	-0.236	-1.157	0.47	-0.19	12	0	0.301	-2.01	25.69	27.65	27.83	28.6	1015.65	0.12	0.28	0.89	-0.15	-3.57	-30	-0.2	1738	0.29	-0.187	0.01	-0.02	0.85	176.7
1979	May	2.42	-0.116	-0.25	-0.18	-0.21	5	0	0.374	-0.9	24.29	27.2	27.69	28.74	1013.37	0.14	0.23	1.09	1.27	-12.9	100	0.8	1652	0.35	0.067	0.07	-0.52	-0.13	117.9
1979	Jun	1.96	-0.041	0.933	-0.08	-0.2	13	0	0.429	1.92	23.28	26.47	27.43	28.73	1018.9	0.11	0.05	0.17	-1.64	-19.6	234	1.1	1803	0.42	0.333	0.1	-0.81	1.56	87.4
1979	Jul	1.16	-0.093	0.039	-0.66	-0.26	2	0.75	0.396	0.86	21.7	25.49	26.82	28.7	1016.9	-0.01	0.04	0.84	0.51	-21.27	0	2.2	1659	0.28	0.44	0.14	-0.56	1.72	93.9
1979	Aug	-0.42	-0.114	-0.684	0.48	-0.32	14	4.75	0.615	1.11	20.94	25.25	26.75	28.34	1014.24	-0.15	0.17	0.52	0.67	-22.24	-190	-0.3	1727	0.08	0.462	0.27	-0.92	1.57	92.3
1979	Sep	-0.89	-0.108	-0.046	0.37	-0.32	27	16	0.759	1.13	21.15	25.48	26.99	28.47	1012.3	-0.23	0.33	1	1.02	-22.7	-102	0.2	2002	0.1	0.302	0.29	-1.81	0.35	61.1
1979	Oct	-0.26	-0.086	-1.243	0.37	-0.29	25	0.25	0.655	0.18	21.46	25.42	26.83	28.58	1008.8	-0.2	0.45	1.06	1.85	-23.32	28	-0.2	2179	0.1	0.007	0.05	0.41	0.71	46.3
1979	Nov	0.08	-0.084	0.475	0.5	-0.19	29	0	0.734	0.42	21.8	25.5	26.99	28.81	1012.46	-0.08	0.52	0.48	0.51	-22.2	31	-0.7	2317	0.11	-0.285	0.06	-0.37	2.48	38.6
1979	Dec	0.89	-0.058	1.295	0.81	-0.14	47	0	1.004	0.84	22.73	25.66	27.11	28.83	1008.99	0.13	0.64	-0.42	-0.68	-16.99	2	-1.2	2035	0.26	-0.758	-0.02	-0.21	0.03	53
1980	Jan	2.99	0	-2.066	0.21	-0.07	30	0	0.677	-1.38	24.32	26.04	27.08	28.69	1006.58	0.28	0.59	-0.11	-1.01	-10.11	1	0.7	2062	0.4	-1.073	-0.15	-0.13	-1.71	127.3
1980	Feb	3.35	-0.077	-0.934	0.21	-0.03	42	0	0.601	-0.39	25.68	26.44	26.97	28.56	999.87	0.27	0.46	1.32	2.03	-5.65	9	0.5	2000	0.41	-1.201	-0.34	-0.18	-0.5	133.8
1980	Mar	3.01	-0.137	-1.433	0.52	-0.03	28	0	0.684	-0.73	26.48	27.03	27.31	28.51	1010.53	0.26	0.34	1.09	-0.64	-2.9	-21	-0.7	1681	0.17	-1.039	-0.26	-0.59	1.09	82.1
1980	Apr	4.19	0.001	-0.419	0.86	0.04	31	0	0.912	1.26	25.54	27.38	27.75	28.76	1011.33	0.24	0.38	1.49	1.66	2.31	-23	-1	2079	0.56	-0.996	-0.11	-0.13	0.72	128.6
1980	May	5.1	0.131	-1.155	0.44	0.06	34	0	0.958	-1.34	23.98	27.1	28.01	29.18	1014.53	0.24	0.48	1.2	-0.16	6.24	19	0	2240	0.71	-1.039	-0.04	0.95	1.85	80.6
1980	Jun	3.64	0.11	0.721	0.64	0.1	16	0	0.911	-0.07	22.76	26.7	27.94	29.13	1018.83	0.07	0.46	-0.22	-0.81	7.33	-19	0	1932	0.47	-1.038	-0.08	1.21	3.29	64.2
1980	Jul	1.53	0.052	-0.622	0.26	0.04	28	0	0.769	-0.39	21.12	25.57	27.23	28.92	1017.14	-0.06	0.25	0.23	-0.81	8.74	40	-0.1	1848	0.19	-1.018	-0.06	-0.01	0.36	114.3
1980	Aug	1.73	0.025	-0.185	-0.12	0.05	24	13	0.329	-3.01	20.52	24.78	26.48	28.5	1018.32	-0.13	0.03	0.51	-2.03	9.61	79	0.6	1662	0.29	-1.135	0.03	0.34	-1.39	64.4
1980	Sep	0.89	-0.006	0.313	0.26	0.05	21	15.5	0.263	0.79	20.43	24.72	26.44	28.49	1014.71	-0.11	-0.07	0.1	-0.08	12.67	-132	-0.8	1839	0.21	-1.284	0.11	1.26	-1.68	82.4
1980	Oct	0.22	-0.06	-0.521	0.11	0.07	19	6	0.192	-1.41	20.52	24.56	26.46	28.74	1010.47	-0.15	0.02	1.35	2.87	13.1	-91	0	2042	0.05	-1.29	-0.03	0.22	0.68	135.8
1980	Nov	0.68	-0.195	-1.361	0.31	-0.01	29	3.75	0.248	-0.52	21.24	25	26.6	28.68	1007.71	-0.21	0.11	0.37	1.28	12.15	14	-0.6	2181	0.03	-1.393	-0.25	0.2	0.33	196.2
1980	Dec	0.75	-0.247	-0.057	0.33	-0.11	21	0	0.111	0.63	22.41	25.23	26.65	28.51	1005.7	-0.13	-0.01	-0.1	-0.57	9.73	4	-0.1	2258	-0.02	-1.425	-0.59	-0.16	-2.41	110.1
1981	Jan	1.72	-0.175	-0.116	-0.31	-0.14	56	0	-0.25	-0.08	23.06	24.95	26.18	28.19	996.44	-0.08	-0.26	0.59	2.46	8.51	-4	0.6	1746	0.27	-1.35	-0.27	-0.17	-0.82	63.3
1981	Feb	2.78	-0.174	-0.332	-0.03	-0.13	41	0	-0.14	0.6	24.93	25.52	26.11	28.02	1005.35	0.16	-0.5	1.46	0.21	6.72	-4	-0.3	2045	0.16	-1.094	-0.47	-0.3	-0.3	148.5
1981	Mar	5.09	0.008	-1.645	0.82	-0.1	48	0	0.455	-1.65	25.94	26.61	26.64	28.15	1006.99	0.2	-0.47	0.99	1.27	7.51	12	-2.1	2053	0.6	-0.835	-0.64	-0.76	0.35	182.5
1981	Apr	4.03	-0.089	0.43	0.18	-0.1	31	0	0.669	0.25	24.81	27.06	27.29	28.11	1014.89	0.24	-0.37	1.45	-1.23	8.28	29	-0.2	2232	0.34	-0.558	-0.52	-1.21	0.22	143.9
1981	May	3.68	-0.077	0.18	-0.35	-0.1	24	0	0.189	0.24	23.65	26.71	27.36	28.36	1013.15	0.05	-0.26	1.75	1.83	3.01	126	1.3	1946	0.36	-0.496	-0.4	-0.77	0.16	74.2
1981	Jun	2.19	-0.055	-0.438	-0.47	-0.08	30	0	-0.024	-0.15	22.49	26.19	27.27	28.38	1014.9	-0.07	-0.29	1.69	-0.1	-3.49	-10	2	1569	0.18	-0.464	-0.22	-0.8	-2.09	111.8
1981	Jul	1.41	-0.088	0.561	-0.58	-0.11	34	0	-0.026	0.08	21.07	25.21	26.65	28.17	1019.23	-0.22	-0.3	0.84	-1.02	-5.22	222	1.4	1919	0.15	-0.533	-0.23	-0.76	0.82	83.6
1981	Aug	0.32	-0.109	-0.244	-0.29	-0.1	35	0.5	-0.09	0.38	19.88	24.38	26.33	28.08	1015.37	-0.28	-0.25	0.18	-1.54	-8.24	-99	1.2	2206	0.09	-0.605	0.12	-0.47	-0.96	42.4
1981	Sep	0.02	-0.03	-1.04	-0.19	-0.15	17	20.75	0.174	-1.27	19.93	24.67	26.53	28.36	1014.53	-0.32	-0.16	0.42	0.08	-8.59	-143	0.5	2195	0.14	-0.708	0.2	0.83	-0.59	27.5
1981	Oct	-0.9	-0.18	-1.167	0.32	-0.16	13	0.25	0.101	-0.96	20.44	24.8	26.42	28.38	1014.26	-0.22	-0.13	0.18	-1.43	-9.53	-112	-0.6	2243	0.04	-0.617	0.35	-0.6	-0.79	86.8
1981	Nov	-0.17	-0.13	-0.188	-0.15	-0.16	21	1	-0.039	-0.53	21.19	24.7	26.29	28.39	1008.77	-0.09	-0.15	0.8	1.19	-9.62	-15	0.3	2078	0.13	-0.621	0.26	0.13	-0.51	45.2
1981	Dec	1.91	0	-1.216	-0.11	-0.13	40	0	-0.126	-0.11	22.63	25.17	26.4	28.45	1008.19	0.08	-0.08	0.67	-0.42	-12.31	-4	0.8	2078	0.27	-0.708	0.1	-0.14	0.74	145.2
1982	Jan	0.37	-0.074	-0.883	-0.36	-0.04	9	0	-0.258	-1.55	24.3	25.86	26.67	28.29	1009.35	0.05	-0.05	0.34	-1.75	-12.52	-5	2	1790	0.19	-1.067	0.03	-0.17	0.03	158.5
1982	Feb	-0.22	-0.072	0.974	-0.06	0.04	14	0	-0.125	0.86	25.31	26.4	26.59	28.02	1011.89	-0.08	0.07	0.2	-1.2	-14.71	4	0.4	2142	-0.07	-1.466	-0.2	-0.14	-1.57	51.9
1982	Mar	-0.45	-0.074	1.074	0	0.07	-2	0	0.1	0.8	25.2	27.11	27.41	28.39	1014.81	-0.22	0.19	0.19	-1.66	-16.67	25	1	2105	-0.07	-1.922	-0.21	-0.37	0.84	60
1982	Apr	-0.68	-0.176	1.454	0.47	-0.03	9	0	0.008	-0.04	24.73	27.57	28.03	28.95	1018.03	-0.21	0.47	-0.19	-2.08	-15.55	50	0.1	1618	-0.16	-2.359	-0.35	0.67	-0.52	132.1
1982	May	0.31	-0.185	-0.209	1.05	-0.14	15	0	0.443	-0.44	24.11	27.64	28.39	29.31	1016.54	-0.22	0.66	-0.58	-0.53	-15.26	-1	-0.6	1447	-0.03	-2.364	-0.37	0.46	0.67	147.6
1982	Jun	-0.3	-0.178	-1.18	1.74	-0.19	4	0.5	0.93	-1.34	23.25	27.16	28.26	29.41	1013.25	-0.24	0.72	-0.78	2.17	-15.94	-54	-1.7	1719	-0.15	-1.924	-0.45	-0.14	1.88	48
1982	Jul	-0.92	-0.222	0.005	1.57	-0.16	13	0	1.612	1.18	22.43	26.22	27.66	29.03	1016.69	-0.36	0.79	0.58	0.49	-8.95	-146	-2.5	1596	-0.27	-1.418	-0.44	-0.46	0.05	104.6
1982	Aug	-0.75	-0.302	0.362	1.9	-0.15	8	0	1.778	0.21	21.81	26.06	27.58	28.87	1017.83	-0.42	1.07	0.39	0.31	-1.58	-48	-2.9	1679	-0.3	-0.811	-0.57	-1.99	0.41	66
1982	Sep	-2.21	-0.301	0.558	2.04	-0.18	15	5.25	1.783	1.86	22.03	26.79	28.21	29.09	1014.84	-0.51	1.58	0.84	0.83	4.21	-291	-2.9	1653	-0.28	0.196	-0.31	-2.16	-0.03	66.4
1982	Oct	-3.12	-0.365	-0.211	2.22	-0.21	13	0	2.001	-0.29	22.83	27.28	28.71	29.44	1015.2	-0.56	1.97	0.37	-0.86	8.27	51	-2.8	1619	-0.34	0.981	-0.11	-2.27	0.53	168.1
1982	Nov	-4.18	-0.41	0.661	2.69	-0.17	14	0	2.394	1.55	24.68	27.5	28.62	29.27	1009.12	-0.63	2.18	-0.25	-0.47	9.51	-13	-4.3	1674	-0.46	1.44	-0.28	-1.31	0.52	114.9
1982	Dec	-5.89	-0.374	0.967	2.38	-0.12	42	0	2.425	1.56	25.97	28.08	28.8	29.05	1005.95	-0.55	2.23	0.26	0.45	10.35	-4	-3.7	1994	-0.5	1.683	-0.17	0.45	1.42	193.9
1983	Jan	-5.87	-0.292	1.359	2.76	-0.07	51	0	2.677	1.34	27.21	28.66	28.89	28.71	1001.17	-0.35	2.18	0.56	0.87	10.85	-5	-5.8	1423	-0.36	1.822	0.33	1.6	-0.05	85.2
1983	Feb	-3.18	-0.097	-1.806	3.08	-0.09	40	0	2.931	-1.04	28.13	28.71	28.69	28.52	997.66	0.02	1.92	1.14	1.44	11.4	-2	-6	1226	-0.02	1.991	0.37	3.17	-0.89	84.5
1983	Mar	1.56	0.088	-0.567	2.5	-0.16	42	0	3.008	0.59	28.72	28.89	28.66	28.55	1003.4	0.31	1.54	2.11	2.03	12.17	-10	-4	1186	0.44	2.282	-0.14	4.47	-1.14	144.4
1983	Apr	2.41	0.066	-0.738	1.57	-0.19	30	0	2.812	-1.07	28.86	29.13	28.77	28.67	1016.23	0.39	1.29	1.87	0.98	13.81	-41	-1.5	1189	0.45	2.929	-0.25	3.73	1.09	194.7
1983	May	1.11	-0.041	-0.441	0.66	-0.14	35	0	2.498	-0.01	28.26	28.98	28.84	29.08	1015.52	0.27	1.06	1.8	-0.08	11.93	-2	1	1371	0.17	3.734	-0.45	4.13	0.5	89.4
1983	Jun	1.25	-0.048	0.313	0.82	-0.04	17	0	2.235	1.31	27.36	28.14	28.27	28.97	1013.57	0.14	0.72	2.36	2.1	3.12	15	0.1	1386	0.35	4.227	-0.45	4.82	-1.78	40.7
1983	Jul	0.67	-0.008	0.131	0.39	0.03	15	0	1.793	1.22	25.76	26.61	27.18	28.63	1017.07	0.01	0.31	3.51	0.82	-3.38	-249	-1	1250	0.23	4.143	-0.31	3.33	0.37	75.6
1983	Aug	-0.98	-0.151	1.098	0.09	0.02	30	2.25	1.159	1.95	23.93	25.77	26.59	28.39	1017.83	-0.07	-0.08	1.85	0.5	-6.53	-406	0.2	1244	0.01	3.867	-0.08	1.88	-1	58.9
1983	Sep	-1.12	-0.209	0.167	-0.67	0.06	38	1.25	0.459	-0.95	22.1	25.03	26.2	27.98	1016.75	-0.15	-0.46	0.91	-1.37	-7.75	-234	1.4	1090	-0.18	3.183	0.04	0.16	-1.73	49.5
1983	Oct	-0.4	-0.189	1.369	-0.77	0.11	14	0	0.024	1.22	22	24.37	25.56	27.87	1014.12	-0.08	-0.81	0.96	0.26	-10.12	-190	0.7	1124	-0.15	2.462	-0.08	0.05	0.54	155
1983	Nov	0.42	-0.151	-0.688	-0.53	0.18	30	0	-0.132	-1.16	22.05	24.07	25.41	27.68	1005.02	-0.01	-1	1.02	1.75	-10.29	-17	-0.2	925	0.05	1.814	0.06	-0.08	-0.41	41.3
1983	Dec	0.52	0.004	0.186	-0.37	0.14	16	0	-0.17	0.18	23.03	24.39	25.57	27.71	1007.09	0.01	-0.91	1.69	-0.61	-11.42	-4	0	934	0.23	1.411	0.39	0.27	-0.8	231.4
1984	Jan	-1.62	-0.1	0.905	-0.37	0.07	30	0	-0.314	1.42	24.18	25.08	25.88	27.49	1006.78	-0.06	-0.6	1.5	0.6	-10.65	-5	0.3	1161	-0.05	1.08	0.68	-0.17	-1.67	92
1984	Feb	-2.97	-0.081	-0.303	-0.54	-0.05	17	0	-0.509	0.37	25.22	26.26	26.56	27.48	1007.5	-0.18	-0.42	1.21	0.73	-11.34	-8	1.4	1406	-0.2	0.907	0.65	-0.3	-0.33	337.5
1984	Mar	-3.43	-0.118	-2.386	0.02	-0.12	28	0	0.151	-0.79	25.62	26.97	26.77	27.47	1005.01	-0.19	-0.34	1.77	1.08	-12.98	5	-0.4	1220	-0.1	0.603	0.79	-0.52	-1.04	157.4
1984	Apr	-2.76	-0.151	-0.284	-0.56	-0.17	8	0	0.39	-0.45	25.3	27.09	27.14	27.75	1015.6	-0.17	-0.43	1.52	1.41	-14.58	-5	0.6	1287	-0.19	0.369	0.5	-0.04	-0.91	212.8
1984	May	-1.77	-0.159	0.479	-0.39	-0.31	33	0	0.18	0.55	23.3	26.32	27.2	28.13	1015.5	-0.23	-0.51	1.3	0.37	-15.05	78	0.3	1283	-0.16	0.148	0.26	-0.8	-1.73	106.1
1984	Jun	-2.65	-0.318	0.007	-0.28	-0.45	4	0	-0.049	-0.12	22.18	25.45	26.83	28.19	1014.88	-0.25	-0.45	0.18	-0.36	-17.97	-42	-0.6	1003	-0.37	-0.183	0.46	-2.62	0.8	90.4
1984	Jul	-3.17	-0.259	0.019	-0.2	-0.57	16	0	-0.054	-0.04	21.33	25.03	26.79	28.3	1018.53	-0.3	-0.3	-0.18	-2.61	-25.39	-256	0.3	893	-0.35	-0.516	0.55	-3.09	0.52	108.3
1984	Aug	-3.57	-0.219	0.466	-0.31	-0.57	15	0	-0.155	1.35	20.45	24.71	26.61	28.17	1015.7	-0.29	-0.16	-0.03	-1.14	-27.9	-702	0.7	837	-0.28	-0.536	0.77	-4.25	0.24	87.4
1984	Sep	-3.43	-0.202	-0.413	-0.21	-0.52	19	3.75	-0.12	0.31	20.66	24.56	26.38	28.22	1012.16	-0.41	-0.24	0.67	-0.02	-25.44	-97	0.2	781	-0.24	-0.277	0.84	-6.13	0.17	108.1
1984	Oct	-3.14	-0.337	-0.27	-0.2	-0.45	14	7	-0.006	0.43	20.51	24.31	26.04	28.02	1011.95	-0.52	-0.56	0.58	-0.53	-21.59	-51	-0.5	735	-0.49	0.186	0.59	-5.28	-1.51	101.8
1984	Nov	-3.12	-0.418	-0.966	-0.66	-0.37	4	4.75	-0.35	-0.2	21.52	24.11	25.52	27.79	1008.04	-0.57	-0.92	0.71	0.39	-13.19	21	0.4	763	-0.46	0.207	0.31	-2.02	0.16	87.3
1984	Dec	-2.68	-0.311	0.446	-0.62	-0.32	-6	2.75	-0.585	-0.09	22.41	23.96	25.25	27.59	1010.8	-0.49	-1.14	0.82	-1.9	-8.16	-4	-0.2	759	-0.5	0.255	0.25	-0.32	0.6	123
1985	Jan	-3.04	-0.348	-2.806	-0.19	-0.3	21	0	-0.546	-2.38	23.79	24.4	25.38	27.68	1000.04	-0.43	-1.04	1.27	1.44	-0.37	-4	-0.5	745	-0.43	0.366	0.32	-0.17	-0.61	58.4
1985	Feb	-2.71	-0.323	-1.44	-0.95	-0.27	-6	0	-0.576	-1	24.72	25.5	26.03	27.49	1014.16	-0.54	-0.85	0.94	-0.99	4.21	-7	2	737	-0.37	0.147	0.52	-0.3	-1.12	38.8
1985	Mar	-3.92	-0.35	0.551	-0.72	-0.25	17	0	-0.696	-0.19	25.6	26.42	26.5	27.31	1016.99	-0.68	-0.77	0.57	-1.19	6.3	14	1.3	733	-0.62	-0.506	0.14	-0.91	1.81	55.2
1985	Apr	-3.9	-0.394	0.652	-1.08	-0.19	11	0	-0.468	0.2	24.16	26.53	26.64	27.48	1017.62	-0.84	-0.78	0.19	-1.27	11.11	-45	1.9	751	-0.65	-0.572	0.15	-2.4	-0.53	72.2
1985	May	-4.94	-0.331	-0.432	-0.5	-0.11	17	0	-0.706	-0.4	22.53	26.19	26.9	27.93	1015.62	-0.74	-0.78	0	-0.82	13.57	-113	0.7	802	-0.7	-0.762	0.24	-1.9	0.72	140
1985	Jun	-0.62	-0.121	-0.347	-0.11	-0.09	17	0	-0.166	-0.5	21.85	25.6	26.81	28.02	1015.55	-0.55	-0.63	0.18	1.28	14.04	-32	-0.6	761	-0.3	-1.244	0.04	-1.59	0.37	135.1
1985	Jul	0.12	-0.146	-0.39	-0.22	-0.15	-1	0.5	-0.126	1.25	20.56	24.71	26.56	28.18	1017.43	-0.32	-0.49	1.07	-0.19	11.1	19	-0.2	787	-0.05	-1.452	0.27	-2.28	0.24	143.8
1985	Aug	-0.26	-0.275	-0.001	-0.64	-0.23	14	5.25	-0.365	-0.74	19.78	24.24	26.3	28.21	1018.13	-0.26	-0.46	0.81	-0.53	11.08	-46	1.6	715	-0.08	-1.337	0.1	-2.76	0.31	76.5
1985	Sep	-0.39	-0.241	0.114	-0.29	-0.24	14	8	-0.535	-0.36	19.74	24.04	26.02	28.28	1015.87	-0.29	-0.4	0.44	-0.63	11.72	-38	0	695	-0.16	-1.499	0.02	-3.15	-0.4	116.8
1985	Oct	-1.1	-0.239	1.035	-0.01	-0.23	11	1.75	-0.148	1.49	20.1	24.18	26.23	28.36	1015.66	-0.29	-0.35	0.29	-1.5	11.84	-148	-0.6	747	-0.14	-1.379	0.27	-2.93	0.09	73.6
1985	Nov	-0.23	-0.289	-1.218	-0.02	-0.23	9	5.75	-0.06	-0.84	20.86	24.4	26.33	28.35	1012.52	-0.3	-0.27	-0.75	-1.83	11.45	-10	-0.3	742	-0.08	-0.95	0.24	-1.74	-0.97	94
1985	Dec	-1.88	-0.33	-1.948	-0.21	-0.2	15	0	-0.279	0.11	22.43	24.5	26.19	28.3	1001.79	-0.38	-0.36	0.38	1.08	9.51	0	0.4	748	-0.25	-0.623	0.29	-0.25	-0.96	118.2
1986	Jan	-3.85	-0.337	-0.568	-0.73	-0.13	29	0	-0.293	0.78	24.56	24.86	25.89	28.07	1001.44	-0.48	-0.49	1.12	0.6	8.74	-5	1.6	732	-0.62	-0.564	0.2	-0.17	-0.36	89.9
1986	Feb	-4.4	-0.269	-2.904	0.26	-0.09	38	0	-0.183	-1.58	26	25.88	26.05	27.96	1000.52	-0.58	-0.47	1.61	0.41	10.15	-3	-1.7	836	-0.63	-0.458	0.47	-0.3	-1.97	72.6
1986	Mar	-4.39	-0.286	1.931	-0.29	-0.11	29	0	0.028	1.39	25.76	26.83	26.87	28.16	1007.7	-0.64	-0.31	2.18	0.51	11.96	-11	0.8	770	-0.61	-0.515	0.38	-0.77	-1.16	100.8
1986	Apr	-5.2	-0.318	0.103	-0.29	-0.15	26	0	-0.107	-0.79	24.68	27.2	27.49	28.28	1018.11	-0.66	-0.2	1.55	-0.15	9.11	-23	0.5	751	-0.64	-0.968	0.28	-1.79	0.04	164.5
1986	May	-4.42	-0.222	0.367	0.05	-0.23	26	0	0.353	0.84	23.23	26.65	27.4	28.58	1015.26	-0.65	-0.12	1.16	-0.03	3.56	9	-0.4	726	-0.54	-1.395	0.26	-0.98	0.28	103.3
1986	Jun	-4.37	-0.255	0.535	-0.31	-0.26	12	1	0.279	1.54	22.05	26.17	27.42	28.77	1013.85	-0.57	-0.04	0.89	0.39	-2.15	-97	1.6	676	-0.59	-1.529	0.41	-1.99	-0.08	54
1986	Jul	-3.02	-0.242	-0.008	0.2	-0.31	12	0	0.401	0.15	21.47	25.67	27.18	28.82	1017.83	-0.54	0.22	1.38	-0.35	-5.25	-71	0.5	702	-0.38	-1.727	0.19	-1.3	-0.04	113
1986	Aug	-2.75	-0.266	-0.826	0.59	-0.32	12	1	0.765	-1.53	20.91	25.29	27.17	28.85	1015.37	-0.48	0.44	0.22	-1.49	-9.6	-272	-0.6	684	-0.41	-1.86	0.21	-2.28	-0.65	22.5
1986	Sep	-1.68	-0.213	-0.023	0.76	-0.34	1	7.25	1.077	-0.95	20.91	25.2	27.24	28.98	1015.04	-0.46	0.71	0.22	-0.28	-10.21	291	-0.8	687	0.04	-1.769	0.3	-1.09	0.69	92.1
1986	Oct	-2.34	-0.312	1.425	0.3	-0.26	13	0	0.96	2.2	21.27	25.51	27.53	28.99	1010.96	-0.48	0.94	1	1.18	-9.6	-53	1.1	830	-0.2	-1.689	0.14	-1.99	-0.27	182.1
1986	Nov	-3.41	-0.391	0.926	1.35	-0.15	10	1.25	0.865	2.27	22.01	25.88	27.71	29.07	1011.89	-0.63	1.14	1.77	-0.71	-8.01	-7	-2	771	-0.6	-1.616	-0.17	-1.44	-0.56	145.8
1986	Dec	-5.95	-0.365	0.06	1.31	-0.07	16	0	1.202	0.83	23.41	26.15	27.72	28.86	1001	-0.6	1.22	1.77	1.06	-10.51	-4	-2.4	726	-0.69	-1.322	0.02	0.02	-0.17	82.3
1987	Jan	-3.66	-0.271	-1.148	0.99	-0.08	35	0	1.249	-1.85	25.56	26.68	27.68	28.62	1003.22	-0.52	1.23	1.88	0.63	-9.93	-5	-1.1	725	-0.32	-0.98	0.02	-0.03	1.57	87.4
1987	Feb	-2.74	-0.211	-1.473	1.42	-0.07	46	0	1.218	-1.27	27.07	27.55	27.88	28.7	1005.45	-0.2	1.19	1.75	0.57	-11.37	-7	-2.1	715	-0.17	-0.584	0.08	0.18	0.37	134.3
1987	Mar	0.18	-0.026	-1.746	1.71	-0.14	16	0	1.716	-0.26	27.93	28.2	28.27	28.79	1008.28	0.03	1.06	2.1	0.85	-14.23	-1	-2.1	740	0.22	-0.221	0.16	1.76	0.22	116.4
1987	Apr	0.93	0.035	0.387	1.84	-0.16	24	0	1.855	2.03	27.1	28.35	28.39	28.7	1012.3	0.24	0.95	2.16	1.54	-16.2	-76	-2.3	849	0.33	-0.192	0.04	2.44	0.48	109.4
1987	May	0.57	0.074	0.325	1.97	-0.16	25	0	2.107	0.96	25.93	28.14	28.56	29.1	1016.47	0.39	0.97	1.85	-1.02	-20.05	-86	-2.1	878	0.37	-0.289	0.28	2.7	1.77	104.9
1987	Jun	2.34	0.209	-0.71	2.08	-0.03	35	0	1.958	-1.53	24.1	27.48	28.65	29.37	1013.99	0.4	1.22	0.73	0.56	-21.47	-8	-1.8	779	0.62	-0.497	0.42	3.12	1.73	115.8
1987	Jul	0.22	0.286	-0.466	2.1	0.07	45	0	1.878	0.55	22.98	26.92	28.59	29.38	1015.87	0.39	1.51	2.01	-0.43	-13.96	-214	-2.2	842	0.48	-0.835	0.5	3.98	0.6	142.6
1987	Aug	0.78	0.286	-0.836	1.87	0.17	27	1.75	1.973	-1.19	21.82	26.57	28.42	29.38	1016.65	0.22	1.7	2.83	0.74	-0.6	-206	-1.5	900	0.56	-1.008	0.43	5.14	-0.49	91.1
1987	Sep	0.38	0.2	0.287	1.68	0.13	39	2.75	1.851	-1.04	21.83	26.56	28.36	29.54	1015.43	0.25	1.65	2.44	-2.6	5.88	-42	-1.7	861	0.4	-1.191	0.32	5.41	1.44	111.5
1987	Oct	0.58	0.053	-0.08	1.14	0.07	31	0.5	1.617	0.66	22.47	26.14	27.96	29.58	1012.45	0.24	1.48	1.36	0.75	9.35	10	-0.6	981	0.45	-1.283	0.42	4.18	0.93	122
1987	Nov	-0.68	-0.064	-0.536	0.74	0.01	24	0	1.257	0.06	22.8	26.09	27.77	29.52	1009.72	0.34	1.25	1.47	1.19	9.23	-19	0	1012	0.36	-1.465	0.63	3.48	0.15	153.8
1987	Dec	1.1	0.049	-0.534	0.9	-0.02	47	0	1.293	0.21	23.48	26.23	27.54	29.3	1009.49	0.26	1.11	1.27	0.5	8.41	-4	-0.8	944	0.52	-1.566	0.39	0.7	1.75	49.2
1988	Jan	-1.36	-0.036	0.265	0.54	-0.03	56	0	1.115	0.68	24.59	26.34	27.45	28.96	1005.4	0.14	0.81	0.93	0.03	7.81	-4	-0.2	1080	0.15	-1.718	0.63	0.31	1.83	176.2
1988	Feb	-2.51	-0.111	-1.066	0.54	-0.1	41	0	0.716	0.42	25.79	26.4	27.03	28.65	1004.18	0.03	0.54	1.24	1.37	6.17	-2	-0.6	1050	-0.02	-1.557	0.66	-0.01	0.3	187.2
1988	Mar	-0.66	-0.005	-0.197	0.18	-0.14	49	0	0.495	-0.58	25.68	27.06	27.38	28.46	1011.88	0.13	0.14	1.42	0.38	5.86	-12	1.1	1149	0.27	-1.35	0.77	0.77	0.53	61.3
1988	Apr	1.39	0.056	-0.561	-0.31	-0.13	45	0	0.389	-1.42	24.7	26.93	27.38	28.27	1013.58	0.23	-0.31	0.94	1.12	6.59	33	0.2	1227	0.38	-1.229	0.59	-0.04	-0.2	284.2
1988	May	0.48	0.142	-0.846	-1.3	-0.11	44	0	0.193	0.64	23.15	25.68	26.68	28.3	1013.46	0.28	-0.88	1.2	0.61	5.46	-106	1.5	1152	0.29	-1.016	0.71	0.15	-0.15	159.4
1988	Jun	1.71	0.17	0.061	-1.11	-0.11	42	0	-0.582	1.19	21.46	24.44	25.99	28.09	1014.03	0.25	-1.3	0.74	1.31	0.42	37	0.1	1394	0.34	-0.911	0.73	-0.3	-0.25	69.4
1988	Jul	1.74	0.113	-0.143	-1.61	-0.15	34	0	-1.109	-0.32	20.59	23.74	25.56	27.96	1017.64	0.12	-1.3	0.64	1.6	-3.96	100	1.7	1527	0.27	-0.771	0.46	-0.39	-1.47	87.1
1988	Aug	0.47	-0.005	0.255	-1.64	-0.23	46	0	-1.295	-0.07	19.55	23.64	25.66	28.02	1015.63	-0.03	-1.11	0.19	-0.62	-2.58	381	2.5	1542	0.03	-0.447	0.5	-0.98	0.78	69.9
1988	Sep	0.2	-0.092	1.039	-1.71	-0.27	41	16.25	-1.526	-0.82	19.44	23.81	25.72	27.84	1016.17	-0.21	-1.19	-0.37	-0.97	-2.29	171	3	1525	0.06	0.274	0.3	-1.86	-0.83	73.1
1988	Oct	-0.28	-0.168	0.032	-1.86	-0.23	39	5	-1.328	-0.66	19.81	23.43	24.82	27.12	1011.55	-0.26	-1.48	-0.1	0.89	-1.53	-134	2.3	1698	-0.2	0.875	0.37	-2.31	-0.56	183.3
1988	Nov	0.08	-0.144	-0.035	-2.06	-0.2	12	0	-1.453	-0.49	20.7	23.44	24.65	26.97	1009.8	-0.3	-1.8	-0.02	0.11	-0.84	4	2.8	1562	-0.23	1.614	0.14	-1.69	-0.96	158.3
1988	Dec	-0.21	-0.161	1.679	-1.47	-0.15	33	0	-1.311	0.48	22.06	23.62	24.63	26.77	1008.35	-0.29	-1.85	-0.43	0.33	-2.42	-4	2	1998	-0.23	2.362	0.19	-0.2	-0.67	87.1
1989	Jan	-2.6	-0.218	3.106	-1.55	-0.2	15	0	-1.103	0.85	24.27	24.22	24.58	26.6	1012.01	-0.34	-1.69	-0.95	-1.57	-2.87	-5	2.5	2354	-0.42	2.629	0.41	-0.17	1.26	163.2
1989	Feb	-2.84	-0.153	3.279	-1.23	-0.26	34	0	-1.241	1.82	26.04	25.44	25.28	26.66	1015.04	-0.51	-1.43	-1.02	-1.71	-3.56	-1	2	2224	-0.48	2.577	0.23	-0.3	0.53	143.7
1989	Mar	-4.84	-0.25	1.53	-1.14	-0.32	36	0	-1.035	1.54	26.34	26.19	26.08	27.16	1013.51	-0.67	-1.08	-0.83	-1.56	-1.63	14	1.8	2051	-0.66	2.039	0.35	-0.91	-1.98	150.1
1989	Apr	-5.79	-0.287	-0.25	-1.66	-0.33	33	0	-0.76	0.16	25.45	26.72	26.74	27.61	1015.95	-0.75	-0.83	-0.32	-0.77	-1.93	-49	2.7	1896	-0.89	1.436	0.29	-1.9	-0.28	73.8
1989	May	-4.45	-0.144	0.889	-1.26	-0.28	16	0	-0.393	1.33	23.21	26.42	27.06	28.13	1017.43	-0.61	-0.58	0.47	-0.04	-5.46	-86	2	1901	-0.66	0.658	0.33	-1.29	0.36	76.4
1989	Jun	0.35	0.094	0.345	-0.74	-0.22	14	0	-0.242	0.03	22.04	26.3	27.14	28.05	1016.45	-0.32	-0.4	0.36	-0.56	-9.38	43	1.2	2396	-0.17	0.103	0.31	-1.84	-0.62	157.9
1989	Jul	2.14	0.18	0.866	-0.64	-0.19	33	0	-0.43	1	21.17	25.35	26.72	28.05	1018.85	-0.07	-0.31	0.83	-0.59	-13.86	21	1.5	1819	0.25	-0.4	0.26	-1.33	0.89	95
1989	Aug	2.68	0.116	0.551	-0.04	-0.18	35	11.25	-0.494	-0.11	20.71	24.72	26.33	28.02	1015.9	-0.01	-0.27	0.09	-0.27	-16.98	369	-0.5	2171	0.39	-0.42	0.39	-0.96	2.52	43.2
1989	Sep	0.52	-0.092	0.703	-0.4	-0.21	36	20	-0.315	2.15	20.07	24.6	26.42	28.26	1013.41	-0.07	-0.24	0.05	0.41	-18.83	-128	0.8	2259	0.06	-0.404	0.21	-2.1	0.44	99.5
1989	Oct	0.54	-0.121	0.991	-0.51	-0.17	32	0.5	-0.342	0.48	20.54	24.58	26.32	28.31	1014.57	-0.17	-0.22	-0.12	-1.08	-21.3	38	1.3	2087	0.12	-0.559	0.28	-0.8	1.5	141.8
1989	Nov	-0.24	-0.147	0.034	0.06	-0.11	20	0	-0.073	0.03	21.41	24.51	26.25	28.16	1014.05	-0.12	-0.16	-0.5	-0.7	-19.01	-11	-0.4	2351	-0.04	-0.839	-0.06	-0.5	-0.47	46.2
1989	Dec	1.63	-0.15	-0.644	0.27	-0.06	37	0	0.131	-1.15	22.41	24.85	26.46	28.42	1005.28	-0.13	-0.05	-0.21	0.57	-13.54	9	-0.9	2130	0.22	-1.019	-0.25	0.03	-1.98	29.9
1990	Jan	-0.18	-0.296	1.001	0.15	0.02	40	0	0.243	0.7	24.09	25.37	26.56	28.48	1007.57	-0.11	0.14	-0.3	-1.09	-8.71	0	-0.1	2101	-0.08	-1.314	-0.34	-0.13	1.37	144.2
1990	Feb	-1.27	-0.159	3.402	1.12	0.06	40	0	0.573	1.16	25.94	26.42	26.96	28.58	1017.47	-0.13	0.21	-0.65	-2.78	-6.74	-6	-3	1783	-0.1	-1.647	0.13	-0.12	0.24	76.9
1990	Mar	-1.6	-0.176	2.99	0.61	0.09	75	0	0.951	1.13	26.04	26.92	27.33	28.63	1010.16	-0.04	0.28	-0.62	0.04	0.95	-23	-0.7	1888	-0.04	-1.634	0.32	-0.31	-0.13	77.8
1990	Apr	-0.8	-0.115	1.879	0.32	0.04	54	0	0.46	2.03	25.02	27.49	27.9	28.75	1015.76	0.02	0.29	0.27	-0.62	5.72	-11	0.3	1853	0.06	-1.573	0.35	0.66	-0.84	123.9
1990	May	0.61	-0.056	0.943	-0.29	-0.01	46	0	0.652	-1.37	24.18	27.41	28.02	28.85	1014.35	0.02	0.29	0.44	0.27	11.46	19	2	1897	0.13	-1.714	-0.06	0.49	0.17	103.2
1990	Jun	-0.3	-0.054	0.304	0.12	-0.07	37	0	0.511	0.29	22.83	26.58	27.64	28.92	1015.8	0	0.31	0.44	-1.39	12.9	-133	0.5	1709	-0.02	-1.81	0.08	0.87	0.77	90.6
1990	Jul	0.91	-0.019	-0.296	0.03	-0.06	43	2.25	0.147	0.56	21.3	25.81	27.38	28.92	1016.9	0	0.33	0.27	-0.26	12.54	82	0.9	1807	0.06	-1.88	-0.11	0.62	0.42	48.6
1990	Aug	2.1	0.055	-0.18	0.47	-0.03	29	7.5	0.127	1.12	20.57	25.23	27.07	28.92	1015.14	0.07	0.38	0.11	1.76	12.63	-330	-0.3	2226	0.3	-2.165	-0.13	0.44	0.59	52.9
1990	Sep	2.08	0.149	-0.21	0.55	0.03	30	10	0.366	1.18	20.24	25.02	26.94	28.98	1013.64	0.13	0.39	0.38	-0.46	13.21	-199	-1.2	1774	0.4	-2.399	-0.07	2.84	0.68	52.5
1990	Oct	1.35	0.115	0.66	0.17	0.01	42	7	0.273	0.76	20.31	24.84	26.93	29.15	1014.46	0.15	0.35	-0.69	-0.91	12.39	-80	0.4	1820	0.41	-2.38	0.1	2.67	0.11	155.4
1990	Nov	0.83	-0.051	0.521	0.4	-0.02	46	0	0.383	-0.39	21	24.9	26.81	29.2	1019.14	0.1	0.4	-1.69	-1.66	11.55	-6	-0.8	1843	0.33	-2.437	0.17	0.73	0.59	120.4
1990	Dec	-0.54	-0.033	1.277	0.4	0	41	0	0.362	0.11	22.31	25.15	26.95	29.19	1011.87	0	0.41	-2.23	-1.62	10.68	3	-0.4	2049	0.17	-2.357	0.22	0.03	0.61	59.5
1991	Jan	-1.29	-0.193	0.723	0.12	0.03	41	0	0.319	0.49	24.02	25.79	27.03	28.9	1007.73	-0.13	0.41	-2.02	0.2	8.71	-4	1	2294	-0.14	-2.109	0.12	-0.03	-1.3	56
1991	Feb	-1.19	-0.115	-0.876	0.23	0.02	50	0	0.323	0.74	25.72	26.41	27.07	28.73	1002.75	-0.3	0.26	-1.19	1.13	8.44	4	0.4	2430	-0.11	-2.09	0.06	-0.03	-0.78	92.1
1991	Mar	-2.06	-0.067	-0.527	0.64	0.02	35	0	0.399	-0.61	26.28	27.04	27.32	28.66	1014.73	-0.41	0.22	-0.74	-1.21	9	18	-1.1	2300	-0.22	-2.002	0.14	0.44	1.83	145.5
1991	Apr	-3.57	-0.131	0.53	0.86	0.03	52	0	0.449	0.17	25.24	27.53	28.01	28.97	1014.04	-0.54	0.26	-1.01	0.38	10.69	29	-1	1988	-0.39	-1.793	0.31	0.96	0.7	110.1
1991	May	-4.43	-0.151	0.486	1.37	0.02	38	0	0.741	0.12	24.09	27.49	28.2	29.38	1014.46	-0.57	0.45	-0.51	-0.63	3.82	258	-1.7	1903	-0.42	-1.766	0.49	0.72	0.56	126.1
1991	Jun	-5.03	-0.127	-0.115	0.94	-0.04	54	0	1.051	-0.52	23.33	27.3	28.25	29.35	1016.24	-0.58	0.64	-1.47	-0.92	-3.34	-29	-0.2	2068	-0.43	-1.843	0.44	1.49	0.63	73.8
1991	Jul	-4.12	-0.105	-0.188	0.71	-0.07	51	0	1.044	-0.46	22.56	26.64	28.05	29.34	1016.62	-0.5	0.73	-0.1	0.28	-10.36	97	0	2120	-0.39	-1.672	0.05	0.89	-1.73	62.6
1991	Aug	-2.15	-0.107	0.797	0.82	-0.06	41	2.25	1.008	1.46	21.37	25.63	27.53	29.26	1014.95	-0.37	0.64	0.36	-0.28	-14.69	75	-0.7	2103	-0.29	-1.706	-0.33	-0.46	-1.15	94.8
1991	Sep	0.38	-0.035	-0.112	1.02	-0.1	50	3.75	0.739	0.61	21.19	25.26	27.14	29.09	1011.72	-0.29	0.62	0.65	1.15	-13.96	-320	-2.5	1806	-0.14	-1.655	-0.36	-0.69	-0.58	68.2
1991	Oct	-1.31	-0.261	-0.252	1.28	-0.2	32	1.75	0.99	0.3	21.67	25.59	27.58	29.47	1013.58	-0.25	0.79	0.49	-2.35	-12.21	125	-1.7	2013	-0.11	-1.657	-0.36	-1.36	-0.32	69.2
1991	Nov	-1.22	-0.259	0.285	1	-0.27	31	0.5	1.172	0.37	22.38	26.05	27.9	29.39	1008.35	-0.3	1.21	0.42	0.22	-12.27	-20	-1.1	1720	-0.15	-1.664	-0.34	-1.78	-0.94	98.7
1991	Dec	-2.19	-0.212	1.613	1.82	-0.29	33	0	1.34	0.34	23.64	26.48	28.29	29.35	1007.76	-0.21	1.53	0.09	0.17	-12.68	-2	-2.9	2239	-0.18	-1.625	-0.08	-0.29	0.29	96.6
1992	Jan	-1.47	-0.189	0.55	2.12	-0.22	45	0	1.747	-0.66	25.03	27.03	28.38	28.94	998.86	-0.1	1.71	0.05	0.99	-13.96	30	-4.7	2176	0	-1.363	-0.27	-0.04	0.35	17.7
1992	Feb	-0.98	-0.093	1.122	1.51	-0.17	42	0	1.886	0.77	26.71	27.67	28.53	29.08	1007	-0.13	1.63	0.31	0.09	-14.33	12	-1.5	2321	0.04	-0.945	-0.26	0.1	-0.81	88.1
1992	Mar	-0.75	-0.091	0.984	2.22	-0.14	47	0	1.985	0.51	27.73	28.26	28.66	28.96	1010.31	-0.24	1.48	0.67	0.46	-16.84	-8	-3.3	1713	-0.18	-0.48	-0.4	0.55	1.12	155.2
1992	Apr	-1.21	-0.183	-0.521	2.05	-0.23	23	0	2.247	1.88	27.72	28.75	29.02	29.09	1013.95	-0.35	1.29	0.75	-0.29	-17.79	4	-1.7	1585	-0.29	-0.278	-0.57	2.72	-0.62	107
1992	May	-0.34	-0.221	1.341	1.19	-0.22	32	0	2.085	2.49	26.63	28.44	28.98	29.23	1015.85	-0.33	1.06	1.54	1.2	-15.96	170	0.4	1254	-0.18	-0.363	-0.66	1.98	-0.21	81.9
1992	Jun	0.02	-0.15	-0.302	1.18	-0.13	24	0	1.735	0.51	23.98	27.17	28.3	29.24	1013.8	-0.28	0.73	1.26	1.36	-15.34	-21	-1	1167	-0.11	-0.564	-0.8	0.96	-0.17	67.3
1992	Jul	0.68	-0.218	0.191	0.69	-0.05	12	0	1.045	0.19	21.89	25.75	27.51	29.21	1017.3	-0.3	0.37	1.9	0.38	-12.05	71	-1	1322	-0.01	-0.992	-0.6	0.74	1.17	48.3
1992	Aug	0.08	-0.38	0.535	-0.08	-0.07	9	4.5	0.559	0.97	20.87	25.03	26.91	28.93	1015.84	-0.31	0.09	1.44	-0.37	-4.75	-62	0.6	1221	-0.23	-1.276	-0.66	-1.3	1.19	43.1
1992	Sep	-0.02	-0.369	-0.64	-0.02	-0.19	1	9.5	0.488	-0.28	20.76	24.83	26.65	28.86	1014.96	-0.32	-0.13	0.83	-1.13	1.3	-71	0.1	1168	-0.21	-1.317	-0.56	-0.53	-1.02	83.6
1992	Oct	0.06	-0.299	-0.366	0.75	-0.2	11	2	0.624	-1.4	21.02	24.64	26.42	28.76	1011.7	-0.3	-0.25	0.93	0.4	3.94	-54	-2.3	1317	-0.06	-1.219	-0.52	0.54	0.81	77.1
1992	Nov	-0.71	-0.334	0.717	0.36	-0.17	4	0	0.569	1.12	21.59	24.64	26.42	28.69	1009.84	-0.28	-0.28	0.93	0.8	6.33	49	-1.1	1452	-0.3	-1.146	-0.79	-0.42	1.26	79.3
1992	Dec	-1.34	-0.284	1.627	0.41	-0.07	22	0	0.664	0.35	22.71	24.87	26.44	28.61	1013.12	-0.26	-0.13	0.53	-1.53	8.19	-3	-0.9	1391	-0.23	-0.878	-0.36	0.08	0.08	81.8
1993	Jan	-2.26	-0.239	3.495	0.59	-0.07	37	0	0.692	1.35	24.55	25.55	26.69	28.54	1010.81	-0.27	0.09	0.05	-1.48	9.63	-4	-1.5	1210	-0.25	-0.819	-0.25	-0.14	-0.22	105.2
1993	Feb	-2.51	-0.186	0.184	0.74	-0.12	39	0	0.99	0.12	26.4	26.8	27.16	28.3	1002.44	-0.28	0.3	0.19	0.44	10.81	7	-1.2	1426	-0.25	-0.668	-0.13	0.03	0.24	145.8
1993	Mar	-3.14	-0.243	0.764	0.81	-0.24	35	0	0.987	0.3	27.09	27.61	27.67	28.37	1007.56	-0.25	0.5	0.76	0.94	11.36	69	-0.8	1364	-0.23	-0.417	-0.09	0.21	-0.48	168.6
1993	Apr	-3.26	-0.173	-0.435	1.71	-0.31	27	0	1.408	0.91	26.79	28.42	28.41	28.66	1009.7	-0.16	0.67	1.21	1.26	12.6	5	-1.9	1159	-0.07	-0.267	0.2	2.19	-1.67	158.5
1993	May	-2.3	-0.163	-1.607	1.2	-0.28	26	0	1.993	-0.67	25.57	28.33	28.71	28.98	1012.52	-0.07	0.7	2.13	2.43	13.56	-71	-0.6	1124	-0.04	-0.481	0.03	2.13	0.96	94.2
1993	Jun	-0.88	-0.181	-0.52	1.39	-0.22	23	0	1.616	-0.29	24.16	27.06	28.08	29.01	1015	-0.09	0.57	2.34	0.66	6.55	2	-1.4	1093	0.07	-0.629	-0.03	0.94	0.04	79.3
1993	Jul	-2.55	-0.276	-0.511	0.94	-0.16	28	0	1.204	-3.14	22.66	26.05	27.52	28.97	1016.91	-0.15	0.32	2.35	-0.28	0.38	149	-1.3	990	-0.17	-0.854	0.05	0.47	-0.31	121.1
1993	Aug	-2.52	-0.228	-0.393	0.92	-0.19	13	4.5	1.026	0.03	21.57	25.36	26.99	28.92	1015.85	-0.23	0.25	2.69	-0.17	-1.2	-142	-1.6	937	-0.11	-1.028	0.04	-0.42	0.52	64.9
1993	Sep	-2.64	-0.164	-0.361	0.65	-0.17	11	5	0.966	-0.41	21.11	25.22	27.07	29.06	1015.66	-0.25	0.15	1.56	-0.97	-1.14	-32	-1.2	870	-0.12	-1.186	0.44	0.19	-0.44	101.2
1993	Oct	-3.22	-0.243	-0.565	0.96	-0.16	23	0	1.045	-0.26	21.57	25.11	26.77	28.78	1012.5	-0.33	0.1	1.41	-0.17	-4.04	-60	-1.8	1003	-0.13	-1.17	0.69	0.56	1.14	55.4
1993	Nov	-5.27	-0.318	1.002	0.24	-0.12	7	0	0.822	2.56	21.96	25.09	26.71	28.79	1013.88	-0.44	0.04	1.24	-0.35	-5.76	32	-0.1	959	-0.34	-1.162	0.75	-0.54	0.83	74.7
1993	Dec	-5.93	-0.293	-0.104	0.12	-0.12	19	0	0.595	1.36	22.83	25.31	26.76	28.72	1006.82	-0.54	0.06	1.07	0.42	-6	-3	0.3	1048	-0.41	-1.005	0.5	0.11	0.89	154
1994	Jan	-6.23	-0.296	-0.288	0.16	-0.09	30	0	0.352	0.7	24.47	25.86	26.64	28.43	1008.31	-0.6	0.06	1.21	-0.8	-7.64	-6	-0.2	1150	-0.59	-1.203	0.32	-0.13	0.47	174.1
1994	Feb	-5.47	-0.309	-0.862	-0.07	-0.06	4	0	0.193	0.08	25.77	26.33	26.81	28.14	1010.4	-0.62	0.07	0.59	-1.27	-9.84	-4	0.4	996	-0.61	-1.399	0.12	-0.22	-1.16	118.1
1994	Mar	-5.56	-0.279	1.881	0.52	0	26	0	0.159	0.92	25.48	26.85	27.39	28.37	1012.37	-0.6	0.17	0.8	0.23	-11.29	-1	-1.1	904	-0.6	-1.611	0.24	-0.26	-0.22	162.6
1994	Apr	-4.92	-0.2	0.225	1.1	0.04	41	0	0.465	1.1	24.27	27.2	28.08	28.74	1013.97	-0.54	0.31	1.05	-0.7	-14.71	-9	-2.1	791	-0.46	-1.847	0.18	0.54	-0.14	171.6
1994	May	-4.82	-0.207	-0.115	0.89	0.01	28	0	0.58	-0.48	23.36	27.15	28.24	29.14	1013.61	-0.48	0.42	1.23	0.48	-18.03	-16	-1.1	799	-0.5	-2.339	0.11	0.22	1.08	159.2
1994	Jun	-3.49	-0.222	1.606	0.83	-0.09	42	0	0.803	1.84	22.21	26.56	28.04	29.23	1016.87	-0.4	0.41	0.46	-1.36	-23.09	8	-0.7	773	-0.43	-2.75	-0.18	0.94	0.48	93.8
1994	Jul	-2.31	-0.231	0.351	1.11	-0.21	32	0	0.904	1.34	21.09	25.53	27.54	29.4	1017.21	-0.3	0.44	0.06	-0.06	-28.65	49	-2.2	805	-0.39	-2.8	-0.26	0.94	1.11	92.5
1994	Aug	-2.24	-0.236	0.828	1.33	-0.23	23	2	0.762	0.36	19.98	24.86	27.38	29.5	1017.52	-0.29	0.43	-0.79	-1.38	-27.02	409	-2	761	-0.29	-2.609	-0.17	-0.59	2.59	156.7
1994	Sep	-1.71	-0.152	-0.084	1.18	-0.17	32	0	0.893	-1.14	20.58	24.85	27.2	29.3	1013.8	-0.28	0.55	-1.36	-2.02	-19.07	446	-2.6	790	-0.24	-2.5	-0.15	0.25	-0.93	77.7
1994	Oct	-1.42	-0.06	0.174	1.29	0	42	0	1.389	-0.54	21.81	25.5	27.47	29.45	1012.66	-0.26	0.74	-1.32	-0.09	-10.29	332	-1.9	877	-0.08	-2.194	-0.05	0.79	0.46	88.8
1994	Nov	-1.7	-0.02	1.779	1.02	0.11	46	5.25	1.282	0.54	22.26	25.99	27.81	29.44	1016.69	-0.24	1.01	-1.96	-1.61	-0.3	19	-0.9	809	-0.03	-1.657	0.08	-0.29	0.77	181.6
1994	Dec	-2.24	-0.091	0.894	1.33	0.16	36	0	1.251	1.78	23.67	26.05	27.85	29.46	1005.4	-0.18	1.09	-1.79	0.39	5.93	-4	-2	774	-0.13	-1.493	0.2	0.27	0.27	96.9
1995	Jan	-1.37	-0.063	-0.154	0.84	0.12	50	0	1.219	0.57	25.3	26.43	27.57	29.04	1002.19	-0.13	0.96	-0.49	0.2	8.38	-6	-0.7	827	-0.05	-1.726	0.4	0.04	-0.18	89.7
1995	Feb	-1.66	-0.04	1.429	0.7	0.09	77	0	0.959	0.85	26.2	26.85	27.49	28.91	1006.59	-0.03	0.72	0.46	0.68	8.01	-4	-0.2	856	-0.04	-1.911	0.61	0.08	-2.05	80.7
1995	Mar	-3.49	0.016	0.393	0.44	0.11	45	0	0.845	0.91	26	27.18	27.75	29.03	1011.94	0.06	0.53	0.75	0.03	8.79	11	1.2	851	-0.05	-2.19	0.74	-0.1	-1.04	108
1995	Apr	-1.58	0.075	-0.963	0.96	0.17	47	0	0.453	-1.07	23.99	27.18	28.1	29.14	1013.9	0.18	0.3	0.83	0.04	11.79	41	-1.1	777	0.11	-2.296	0.61	0.48	0.72	197.3
1995	May	0.76	0.271	-0.891	0.63	0.21	28	0	0.57	-1.33	23	26.53	27.82	29.31	1013.84	0.26	0.14	1.46	0.09	14.92	-10	-0.6	755	0.3	-2.263	0.59	0.16	0.91	197.9
1995	Jun	1.33	0.363	-0.112	0.28	0.2	44	0.75	0.507	0.44	22.2	26.07	27.59	29.18	1014.58	0.32	-0.03	1.27	0.9	15.62	-67	0.2	757	0.48	-2.004	0.64	1.58	-1.32	120.6
1995	Jul	2.48	0.313	-0.217	0	0.15	48	0	0.234	-0.19	21.35	25.36	27.08	28.93	1016.82	0.34	-0.24	1.71	-0.74	11.74	-21	0.7	739	0.58	-1.533	0.35	2.71	0.83	98.5
1995	Aug	2.99	0.182	0.544	-0.2	0.12	47	25.75	-0.147	0.76	20.6	24.21	26.23	28.65	1017.25	0.34	-0.54	0.21	-0.33	9.53	116	0.5	738	0.59	-1.006	-0.07	3.02	-0.74	12.6
1995	Sep	2.91	0.053	-0.549	-0.42	0.08	34	23.25	-0.445	0.45	20.44	23.86	25.88	28.41	1010.19	0.3	-0.81	1.16	1.22	6.98	-7	0.4	720	0.4	-0.569	-0.04	1.63	0.05	36.8
1995	Oct	3.46	0.101	0.075	-0.26	0.05	48	11.25	-0.481	0.72	20.46	23.98	25.84	28.31	1012.92	0.31	-0.97	0.47	0.11	3.43	-39	0	779	0.37	-0.342	-0.05	1.96	-0.42	72.4
1995	Nov	4.66	0.126	-0.723	-0.38	0.03	44	0.5	-0.474	-1.59	21.37	24.04	25.6	28.11	1011.95	0.35	-1	-0.28	-0.73	-0.77	-8	0.1	742	0.51	-0.188	0.12	0.79	-1.76	142.1
1995	Dec	4.35	0.041	-2.127	0.01	0	29	0	-0.537	-1.64	21.96	24.25	25.65	28.04	999.68	0.51	-0.98	0.16	0.62	-4.57	56	-0.8	726	0.47	-0.028	0	-0.03	-1.72	182.6
1996	Jan	5.71	-0.011	-1.2	-0.66	-0.01	27	0	-0.597	-0.65	23.92	24.85	25.69	27.85	1008.3	0.5	-0.9	0.59	-0.68	-5.79	-3	1.6	745	0.74	0.036	0.18	-0.17	-0.92	95
1996	Feb	2.64	-0.033	0.163	-0.39	-0.05	49	0	-0.566	-0.52	25.66	25.73	25.89	27.67	1007.99	0.42	-0.75	0.75	-0.7	-6.9	1	0.4	715	0.4	-0.373	0.43	-0.25	0.07	176.2
1996	Mar	0.09	-0.058	-1.483	-0.52	-0.07	33	0	-0.236	-0.66	26.16	26.67	26.67	27.92	1010.94	0.31	-0.59	1.01	-0.75	-9.92	-10	1.9	707	0.22	-0.6	0.47	-0.41	-0.3	95.8
1996	Apr	0.02	0.009	-1.525	-0.53	-0.13	38	0	-0.391	-0.33	23.62	26.75	27.35	28.17	1009.61	0.23	-0.39	1.46	0.51	-11.08	-18	1.3	693	0.31	-0.911	0.65	-0.51	-2.12	134.8
1996	May	-0.15	-0.066	-0.226	-0.48	-0.19	29	0	-0.041	-0.93	22.97	26.51	27.55	28.46	1015.82	0.19	-0.31	2.18	0.37	-14.88	49	0.5	701	0.36	-1.525	0.77	-0.27	-1.46	175.8
1996	Jun	-1.58	-0.124	0.497	-0.54	-0.26	26	0	0.087	0.87	21.24	25.86	27.29	28.49	1016.67	0.11	-0.3	1.1	-1.18	-17.03	-10	1.9	696	0.18	-1.984	0.87	-0.23	-0.09	127.7
1996	Jul	-1.27	-0.106	0.715	-0.26	-0.28	37	6.5	-0.173	0.7	20.7	25.17	26.85	28.45	1018.22	0.03	-0.27	0.77	0.18	-23.93	-50	1.1	712	0.12	-2.02	0.66	-1.23	1.66	141.4
1996	Aug	-0.58	-0.009	0.125	-0.35	-0.22	49	11.25	-0.374	1.19	20.14	24.69	26.64	28.47	1018.09	0	-0.32	-0.14	-0.93	-25.85	-107	1.2	724	-0.03	-1.961	0.35	-2.14	-1.18	99
1996	Sep	0.53	-0.002	-1.14	-0.44	-0.19	27	17.5	-0.457	-0.69	20.08	24.41	26.27	28.4	1014.62	-0.08	-0.35	0.24	-0.27	-26.02	88	1	694	0.15	-1.89	0.13	0.88	-1.41	93.3
1996	Oct	1.17	-0.145	0.183	-0.28	-0.16	20	9.25	-0.359	0.15	20.31	24.39	26.27	28.45	1014.33	-0.14	-0.4	-0.33	-0.67	-23.4	7	1	692	0.08	-1.73	0.12	-0.37	-0.78	145
1996	Nov	1.42	-0.175	0.136	-0.03	-0.23	42	0.5	-0.149	-0.72	20.56	24.45	26.29	28.47	1012.28	-0.12	-0.45	0.09	-0.44	-18.08	-12	-0.1	787	0.03	-1.662	0.12	-1.63	0.26	57
1996	Dec	2.32	-0.156	-1.721	-0.48	-0.24	41	0	-0.325	-1.4	21.68	24.22	25.95	28.35	1009.82	0.04	-0.49	-0.03	-1.53	-9.86	0	1.5	778	0.14	-1.505	-0.06	-0.14	0.6	1.9
1997	Jan	4.26	-0.092	-0.457	-0.3	-0.26	32	0	-0.48	-1.08	23.66	24.77	26.01	28.33	1002.04	0.2	-0.5	0.23	0.16	-3.57	-1	0.8	740	0.31	-1.345	-0.22	-0.17	-2.31	121.2
1997	Feb	3.32	-0.036	1.889	-0.75	-0.19	37	0	-0.605	1.48	25.88	25.73	26.38	28.39	1004.22	0.26	-0.36	0.28	0.45	1.94	-8	2.9	738	0.34	-1.149	-0.34	-0.21	-0.24	155.8
1997	Mar	2.7	0.004	1.091	0.42	-0.18	52	0	-0.248	1.13	27.03	26.86	27.04	28.56	1014.99	0.26	-0.1	0.65	-1.56	4.77	12	-0.7	735	0.15	-0.538	-0.47	0.19	-0.16	183.2
1997	Apr	2.11	0.007	0.324	0.97	-0.12	37	0	0.527	-1.25	26.44	27.47	27.98	29.22	1011.38	0.25	0.28	1.05	0.29	9.74	38	-1	745	0.27	0.297	-0.5	0.67	-1.04	215.8
1997	May	2.52	0.039	-0.961	2.1	-0.08	39	0	1.132	-0.21	26.54	27.9	28.58	29.44	1012.88	0.26	0.75	1.83	0.77	12.37	90	-2.2	746	0.43	1.055	-0.54	2.16	1.21	229.5
1997	Jun	2.32	0.008	-0.815	2.11	0.04	54	0	2.275	-1.17	26.12	28.13	28.82	29.23	1014.84	0.16	1.22	2.76	-0.25	14.5	138	-2.3	717	0.54	1.783	-0.67	3.77	-0.67	63.6
1997	Jul	0.23	0.06	-0.431	1.89	0.11	35	2.25	2.825	0.37	25.59	27.9	28.86	29.37	1015.95	-0.02	1.6	2.35	0.1	14.85	-243	-1.2	711	0.34	2.51	-0.27	4.75	0.4	375.5
1997	Aug	-1.4	0.014	0.121	2.48	0.12	42	0	3.002	0.94	24.96	27.71	28.75	29.29	1015.97	-0.09	1.9	2.79	-0.55	11.69	-172	-2.4	790	0.16	2.833	-0.09	5.05	-0.34	63.7
1997	Sep	-1.16	0.108	0.195	2.27	0.04	55	7.25	2.99	0.74	24.69	27.74	28.85	29.44	1012.47	-0.03	2.14	2.19	0.22	11.64	-46	-2.4	962	0.26	2.944	0.21	6.13	0.38	109.9
1997	Oct	-0.15	0.149	-0.7	2.15	-0.02	64	0	2.361	-1.34	24.69	28.06	29.08	29.34	1013.29	0.12	2.33	1.61	-0.12	9.91	14	-2.4	849	0.59	3.09	0.69	6.07	-2.15	118.8
1997	Nov	-0.35	0.05	-0.661	1.92	0.03	66	0	2.516	-1.08	26.12	28.37	29.12	29.39	1009.99	0.22	2.4	1.12	0.86	5.74	-7	-2	995	0.58	3.037	0.79	4.73	1.84	422.9
1997	Dec	-1.44	0.13	-0.071	1.74	0.11	60	0	2.344	-0.98	27.06	28.53	28.89	29.11	1008.35	0.28	2.39	0.67	0.85	0.78	-5	-1.6	988	0.44	2.858	1.03	3.32	0.91	113.4
1998	Jan	-1.55	0.129	-2.081	2.73	0.21	61	0	2.455	-0.05	28.12	28.74	28.93	28.95	1000.74	0.47	2.24	0.83	0.3	-0.85	-2	-4.4	934	0.43	2.716	0.72	3.57	0.06	99.5
1998	Feb	1.52	0.291	-0.183	2.61	0.17	90	0	2.777	-0.57	28.74	28.9	28.78	28.79	1000.2	0.58	1.93	1.56	0.89	-2.96	-4	-3.4	934	0.77	2.87	0.74	4.93	0.67	146.9
1998	Mar	2.17	0.321	-0.254	2.46	0.15	63	0	2.751	0.51	29.23	29.12	28.62	28.62	1008.11	0.67	1.44	2.01	0.69	-4.92	-22	-4	1091	0.75	3.045	0.69	5.43	1.04	197.7
1998	Apr	0.74	0.29	-0.038	1.55	0.13	63	0	2.658	-0.88	28.22	29.22	28.6	28.56	1015.1	0.56	0.99	1.27	0.85	-7.82	28	-2.4	1083	0.59	2.983	0.54	4.8	2.32	259.9
1998	May	1.2	0.383	0.429	0.63	0.32	70	0	2.206	-1.17	27.14	28.64	28.51	28.66	1015.82	0.48	0.45	0.7	-1.87	-14.08	6	0.4	1067	0.59	3.164	0.54	4.46	1.88	202.2
1998	Jun	1.42	0.488	-0.711	-0.95	0.47	78	0	1.336	-2.44	25.36	26.99	27.34	28.26	1017.74	0.39	-0.13	0.4	0.09	-18.57	-31	1.6	1084	0.66	3.21	0.66	5.33	-0.34	216.5
1998	Jul	0.85	0.487	-0.212	-1.5	0.58	71	0	0.392	-0.45	23.37	25.42	26.3	28.11	1017.81	0.37	-0.78	-0.04	1.67	-22.97	-110	2	1140	0.56	2.762	0.85	6.02	-0.4	338.8
1998	Aug	1.89	0.511	0.65	-1.44	0.5	68	13	-0.336	-0.15	21.97	24.45	25.57	27.77	1018.76	0.31	-1.12	-0.22	-0.6	-24.7	116	1.9	1360	0.67	2.45	0.59	5.82	-0.02	128.7
1998	Sep	1.35	0.411	-1.05	-1.23	0.46	45	28	-0.636	-1.8	20.95	23.95	25.46	27.74	1014.46	0.28	-1.31	-1.21	0.42	-22.12	492	1.7	1383	0.51	2.368	0.41	3.35	1.81	21.4
1998	Oct	4.11	0.381	0.294	-1.28	0.39	46	6	-0.808	0.2	21.35	23.99	25.25	27.42	1013.9	0.22	-1.35	-1.39	0.77	-18.77	-31	1.8	1173	0.49	2.262	0.21	3.32	1.32	352.9
1998	Nov	4.39	0.316	-1.449	-1.28	0.36	50	1	-1.071	-0.43	21.51	24.24	25.24	27.24	1008.96	0.2	-1.48	-0.52	0.7	-12.22	-20	1.7	1402	0.43	2.225	0.32	1.56	0.34	113.7
1998	Dec	3.97	0.278	1.353	-1.52	0.32	56	0.5	-0.908	0.72	22.63	24.13	24.91	27.06	1011.37	0.09	-1.57	-0.44	-0.39	-3.96	-1	2.3	1501	0.29	2.475	0.11	-0.04	0.6	81.8
1999	Jan	1.36	0.05	0.11	-1.7	0.27	48	0	-1.039	0.39	23.79	24.41	24.86	26.64	1007.95	-0.11	-1.55	-0.32	-0.44	3.09	-4	3	1426	-0.1	2.451	0.13	-0.17	0.08	269.9
1999	Feb	-0.3	0.056	0.482	-1.22	0.23	66	0	-1.123	-0.11	25.56	25.52	25.43	26.56	1006.91	-0.32	-1.3	-0.66	-0.46	5.84	-3	1.6	1420	-0.2	2.095	0.05	-0.23	1.51	333
1999	Mar	-2.06	0.068	-1.492	-1.04	0.18	34	0	-0.95	-0.16	26.45	26.68	26.33	26.98	1012.04	-0.38	-1.07	-0.33	0.38	8.59	-11	2.1	1263	-0.23	1.7	0.33	-0.24	1.19	423.6
1999	Apr	-2.8	0.051	0.284	-1.22	0.21	33	0	-0.88	-1.18	24.64	26.71	26.7	27.41	1017.12	-0.31	-0.98	-0.41	0.05	13.51	12	2.3	1172	-0.13	1.138	0.45	-0.5	1.3	490.3
1999	May	-1.87	0.161	0.226	-0.64	0.19	33	0	-0.596	0.9	23.73	26.45	26.79	27.89	1015.72	-0.21	-1.02	-0.68	-0.05	15.56	-69	0.4	1486	0.11	0.449	0.53	-0.83	-0.3	262.2
1999	Jun	-0.83	0.179	0.707	-0.82	0.12	37	0	-0.339	1.44	22.36	25.72	26.53	27.96	1014.03	-0.15	-1.04	-1.3	0.43	15.23	-115	0.4	1698	0.15	-0.101	0.49	0.71	0.32	146.5
1999	Jul	-1.1	0.197	-0.002	-0.78	0.09	40	0	-0.478	-0.87	21.73	25.05	26.13	27.75	1019.11	-0.09	-1.1	-0.66	-0.92	14.11	215	0.9	1656	0.17	-0.311	0.64	-0.08	0.26	120.9
1999	Aug	0.94	0.306	-0.672	-0.95	0.09	34	14.25	-0.739	0.38	20.89	24.28	25.63	27.69	1014.38	-0.02	-1.11	-0.96	1.95	11.91	629	0.6	1708	0.34	-0.369	0.55	3.09	1.12	103.5
1999	Sep	2.35	0.184	0.059	-0.54	0.09	43	15.75	-0.967	0.5	19.67	23.79	25.63	27.79	1014.29	0.04	-1.16	-1.53	0.33	11.18	327	-0.1	1357	0.38	-0.2	0.24	1.45	0.6	192.7
1999	Oct	2.2	0.016	-0.006	-1.03	0.03	43	6.25	-0.97	0.73	20.15	23.6	25.48	27.79	1014.49	0.05	-1.26	-2.23	0.62	10.62	257	1.6	1648	0.25	0.152	0.28	0.21	-0.45	141.2
1999	Nov	2.29	-0.05	0.611	-1.3	-0.08	42	4.75	-1.041	0.55	20.43	23.6	25.12	27.42	1011.32	0.01	-1.46	-2.05	0.45	6.01	6	1.7	1915	0.13	0.477	0.33	-0.08	1.91	40.5
1999	Dec	3.66	0.014	1.043	-1.49	-0.16	46	0	-1.142	1.4	22.17	23.68	24.86	27.18	1010.54	-0.06	-1.65	-1.63	-0.09	6.43	-3	2.4	1698	0.27	1.065	0.36	-0.21	-1.12	169.9
2000	Jan	1.19	-0.085	1.27	-1.26	-0.22	26	0	-1.122	0.19	23.81	24	24.78	26.99	1013.54	-0.13	-1.66	-2	-1.7	4.85	12	1.1	1581	-0.18	1.452	0.21	-0.17	-0.21	95.2
2000	Feb	-0.38	-0.039	1.076	-1.75	-0.2	58	0	-1.189	1.48	25.48	25.27	25.21	26.73	1000.9	-0.16	-1.41	-0.83	1.2	4.2	-7	2.7	1732	-0.1	1.827	0.39	-0.3	-0.41	215.6
2000	Mar	0.31	0.103	-0.451	-1.2	-0.15	59	0	-1.09	0.4	26.02	26.7	26.3	26.89	1005.93	-0.14	-1.07	0.29	0.95	5.51	-11	2.2	2082	0.06	1.857	0.4	-0.8	0.01	158.7
2000	Apr	-1.41	0.041	-0.279	-1.01	-0.05	59	0	-0.397	-0.18	25.5	27.41	26.95	27.2	1015.08	-0.15	-0.81	0.35	-0.58	3.98	-17	2	1842	-0.01	1.494	0.37	-0.04	-1.3	199.5
2000	May	-1.99	0.104	0.969	-0.58	-0.04	39	0	0.251	1.52	24.02	26.88	27.07	27.63	1016.26	-0.23	-0.71	-0.05	-0.16	-0.99	-19	0.6	1845	-0.06	0.783	0.29	-0.31	-1.46	232.4
2000	Jun	-2.3	-0.019	0.586	-0.27	-0.04	43	0	0.001	0.28	22.75	26.03	26.94	28.06	1015.37	-0.24	-0.64	-0.44	-1.19	-7.83	32	-0.3	1798	-0.16	0.17	0.2	-1.11	0.57	110.9
2000	Jul	-1.05	0.071	-0.649	-0.07	-0.07	41	0	-0.159	-1	21.68	25.18	26.63	28.17	1017.37	-0.21	-0.55	-0.66	-2.55	-13.13	204	-0.3	2047	0.01	-0.465	0.15	-0.66	1.07	69.3
2000	Aug	-0.38	0.102	0.144	-0.44	-0.04	43	14	-0.145	-0.5	20.44	24.64	26.37	28.16	1018.06	-0.16	-0.51	-1.19	-0.51	-15.31	-113	1.2	1631	0.15	-0.707	0.2	1.09	-0.86	75.9
2000	Sep	-0.12	0.101	0.395	-0.72	-0.01	42	13.5	-0.238	-0.06	20.5	24.59	26.2	28.27	1013.41	-0.16	-0.55	-1.24	-1.21	-15.52	-155	1.4	1821	0.02	-0.798	0.02	1.16	0.52	222.8
2000	Oct	0.15	-0.041	0.317	-0.9	0	29	5.25	-0.391	1.51	20.74	24.48	26.02	28.11	1012.85	-0.24	-0.63	-1.3	0.44	-14.04	141	1.8	1677	0	-0.377	0.1	0.96	1.14	56.3
2000	Nov	0.39	-0.054	-1.581	-1.4	0.02	34	0	-0.713	-1.1	20.46	24.4	25.92	27.92	1009.13	-0.33	-0.75	-0.53	0.7	-15.07	-5	3	1788	-0.12	-0.097	0.07	0.65	-0.23	116.6
2000	Dec	0.24	-0.128	-2.354	-0.78	-0.01	30	0	-0.55	-0.63	21.85	24.57	25.68	27.59	1003.25	-0.33	-0.74	0.52	0.92	-14.56	-4	1.3	1736	-0.19	0.362	-0.01	0.03	-0.68	94.9
2001	Jan	0.4	-0.128	-0.959	-0.87	0	43	0	-0.496	-0.22	23.94	25.24	25.81	27.43	1002	-0.27	-0.68	0.6	1.29	-15.69	-6	1.6	1666	-0.13	0.785	0.16	-0.17	0.42	159.3
2001	Feb	-0.06	-0.027	-0.622	-1.15	0	45	0	-0.649	0.07	25.62	26.12	26.12	27.37	1009.46	-0.11	-0.52	0.29	-0.51	-15.53	-8	2.8	1467	-0.15	1.25	0.17	-0.24	1.57	94.8
2001	Mar	0.15	0.014	-1.687	-0.46	0.03	57	0	-0.548	-1.73	26.66	27.2	26.8	27.61	1011.58	-0.07	-0.44	0.45	0.39	-15.99	-18	1.5	1777	0.15	0.853	0.29	-0.44	-1.05	174.1
2001	Apr	-1.45	-0.013	0.906	-0.09	0.02	52	0	-0.05	-0.15	25.72	27.46	27.33	28.04	1016.05	-0.03	-0.34	-0.31	-0.7	-17.73	38	0.3	1781	0.05	0.239	0.38	0.12	1.1	131
2001	May	-2.08	-0.01	0.452	0.36	0.03	58	0	0.282	0.03	23.71	27.11	27.6	28.53	1015.52	-0.03	-0.25	-0.3	-0.01	-20.99	-61	-0.8	1479	0.06	-0.568	0.47	-0.68	-1.16	115.5
2001	Jun	-0.64	0.197	-0.015	0.13	0.06	54	0	0.052	0.11	22.28	26.34	27.54	28.79	1016.5	0.03	-0.12	-0.47	-0.89	-23.31	146	0.5	1737	0.24	-1.504	0.36	0.51	0.41	147.9
2001	Jul	0.41	0.134	-0.031	0.44	0.09	61	0	0.297	-0.22	21.38	25.53	27.25	28.98	1017.41	0.05	-0.08	-1.31	-0.36	-24.45	116	-0.3	1313	0.3	-2.452	0.15	0.57	-0.32	102.7
2001	Aug	0.41	0.177	0.52	0.51	0.14	48	0	0.332	-0.22	20.16	24.9	26.8	28.84	1016.4	0.08	-0.13	-0.77	-0.14	-21.67	-102	-0.7	1631	0.34	-2.846	0.14	2.95	-0.27	97
2001	Sep	2.93	0.285	-0.707	-0.08	0.11	55	15.5	-0.174	-0.49	19.6	24.31	26.52	28.97	1013.72	0.13	-0.19	-1.37	0.04	-14.29	-44	0.3	2338	0.51	-2.858	0.11	3.09	2.28	129.8
2001	Oct	3.31	0.251	0.707	0.14	0.1	51	3.25	-0.276	0.25	19.88	24.55	26.57	28.95	1013.92	0.24	-0.29	-1.37	-0.08	-10.81	-108	-0.1	2081	0.48	-2.637	0.2	2.07	-0.58	44.3
2001	Nov	5.03	0.155	0.819	-0.4	0.12	70	6.75	-0.151	0.53	20.77	24.42	26.33	28.78	1006.79	0.37	-0.35	-1.26	1.03	-3.88	17	1.1	2127	0.62	-2.674	0.16	1.89	0.79	124
2001	Dec	5.54	0.213	-1.322	0.41	0.16	55	0	0.033	-0.86	21.79	24.61	26.19	28.66	1006.74	0.57	-0.31	-0.93	0.26	1.48	-4	-1.4	2356	0.66	-2.37	0.01	-0.01	-0.35	145.6
2002	Jan	6.05	0.181	1.381	-0.15	0.19	74	0	0.017	0	23.79	25.17	26.39	28.72	1007.86	0.61	-0.15	0.27	-0.7	4.64	51	0.7	2273	0.78	-1.78	0.14	-0.13	-0.04	61
2002	Feb	4.3	0.164	1.304	-0.33	0.18	76	0	-0.16	0.8	26.03	26.16	26.71	28.66	1010.13	0.51	0.03	-0.64	-0.11	8	-3	1.8	2050	0.53	-1.343	-0.06	-0.14	0.87	71.5
2002	Mar	2.14	0.144	0.902	0.44	0.22	91	0	-0.118	0.32	27.25	27.35	27.29	28.57	1014.46	0.25	0.09	-0.43	-1.56	9.32	-4	-0.4	2044	0.37	-1.287	0.29	0.06	0.73	117.2
2002	Apr	-2.38	0.026	0.748	0.4	0.22	58	0	0.401	1.14	26.35	27.58	27.84	29.03	1018.43	0	0.2	-0.32	-2.4	14.03	-20	-0.1	1898	-0.02	-1.326	0.31	0.81	0.21	107.4
2002	May	-4.39	-0.049	0.401	1.06	0.12	64	0	0.886	-0.15	25.04	27.51	28.24	29.52	1014.35	-0.14	0.43	-0.63	-0.56	14.16	-95	-1.4	1784	-0.19	-1.663	0.49	0.47	-0.79	116.1
2002	Jun	-4.43	-0.118	0.573	0.99	0	53	0	0.932	0.69	23.51	27.19	28.44	29.61	1013.67	-0.22	0.65	-0.35	0.06	13.26	-109	-0.4	1487	-0.13	-2.335	0.33	-0.36	-0.72	62.7
2002	Jul	-3.56	-0.066	0.328	1.12	-0.01	62	0	0.712	0.65	21.72	26.19	28.03	29.52	1016.85	-0.18	0.79	-0.31	0.4	10.05	-217	-0.8	1735	-0.06	-2.871	0.47	0.71	-1.06	72.5
2002	Aug	-1.99	0.106	-0.229	1.45	0.06	55	0	1.002	0.36	20.74	25.63	27.72	29.43	1016.2	-0.15	0.86	0.6	0.61	10.6	-287	-1.6	1839	-0.05	-3.001	0.01	0.68	-1.64	47.3
2002	Sep	-0.73	0.079	-0.043	1.21	0.17	65	8	0.881	-0.54	20.93	25.76	27.81	29.37	1014.54	-0.02	1.01	0.43	0.6	8.9	-69	-1	1758	0.07	-2.878	-0.08	1.77	0.79	22.1
2002	Oct	1.14	0.11	-1.488	1.15	0.23	57	2.75	0.979	-1.97	21.39	25.97	27.96	29.41	1010.22	0.01	1.21	0.42	-0.55	7.66	195	-0.6	1670	0.36	-2.546	0.14	3.03	-2.12	128.4
2002	Nov	0.91	0.018	-1.425	1.2	0.23	59	0	1.076	-0.32	22.63	26.4	28.17	29.55	1004.55	0.01	1.31	1.51	1.46	4.46	-18	-0.7	1687	0.22	-2.413	-0.07	1.15	-1.51	97.4
2002	Dec	-0.45	0.004	-1.592	1.48	0.2	43	0	1.156	-0.96	23.91	26.44	27.97	29.38	1003.26	0.03	1.14	2.1	1.28	-0.5	2	-1.8	1572	0.2	-2.311	0.35	0.01	0.54	92.8
2003	Jan	0.13	0.049	-0.472	0.85	0.23	73	0	1.214	-0.32	24.69	26.23	27.15	28.89	999.59	0	0.92	2.09	1.01	-1.39	0	-0.3	1440	0.27	-2.523	0.56	-0.03	-0.14	33.9
2003	Feb	-1.6	-0.013	0.128	1.07	0.35	55	0	0.944	0.26	25.98	26.84	27.39	28.88	1007.49	0.01	0.63	1.75	0.68	-1.43	0	-1.1	1245	0	-2.644	0.57	0.02	0.17	68.3
2003	Mar	-3.1	0.112	0.933	0.83	0.41	57	0	0.83	-0.07	26.42	27.39	27.65	28.92	1010.44	-0.02	0.38	1.51	-0.36	-3.3	3	-0.5	1322	0.04	-2.91	0.63	1.21	-1.01	91.8
2003	Apr	-1.79	0.078	-0.178	0.3	0.41	55	0	0.413	-0.34	24.98	27.14	27.68	28.96	1014.47	0.01	-0.04	1.18	-0.1	-8.56	23	-0.2	1263	0	-2.995	0.42	0.46	1.58	183.1
2003	May	-1.51	0.15	1.017	0.08	0.3	62	0	0.214	0.06	22.77	26.29	27.32	28.86	1015.92	0	-0.26	0.89	-1.85	-13.63	-32	-0.5	1162	0.06	-3.04	0.37	-0.09	0.03	156.8
2003	Jun	-0.11	0.204	-0.102	0.32	0.16	48	0	0.107	0.24	21.77	26.03	27.44	29.07	1013.69	0.05	-0.16	0.68	-0.53	-17.71	200	-1	1293	0.22	-2.895	0.1	1.43	0.76	90.7
2003	Jul	-0.16	0.275	0.075	0.23	0.09	55	2	0.177	0.16	20.95	25.92	27.5	29.08	1018.2	0.2	0.08	0.96	0.73	-22.99	178	0.5	1277	0.36	-2.723	0.4	1.99	-1.94	81.4
2003	Aug	1.37	0.414	-0.28	0.17	0.09	66	2.25	0.309	-0.22	21.02	25.38	27.11	28.98	1016.42	0.34	0.21	0.88	-0.31	-24.64	324	0.2	1221	0.59	-2.412	0.49	4.58	-0.9	13
2003	Sep	2.67	0.451	0.467	0.31	0.19	66	23	0.46	0.16	20.28	25.05	26.99	28.94	1013.25	0.51	0.26	0.01	0.59	-22.51	134	-0.2	1122	0.66	-2.082	0.49	3.74	-2.17	59.8
2003	Oct	3.82	0.425	-0.67	0.44	0.24	75	5.5	0.497	-0.86	21.25	25.38	27.14	29.12	1011.44	0.45	0.29	0.83	1.23	-20.34	113	0	1513	0.8	-1.738	0.53	4.71	-0.42	63.5
2003	Nov	2.17	0.222	0.642	0.46	0.22	54	0	0.563	0.77	21.94	25.75	27.04	29.07	1018.1	0.41	0.35	0.52	-1.65	-17.86	21	-0.5	1408	0.48	-1.596	0.55	2.91	0.69	131.1
2003	Dec	1.98	0.223	0.265	-0.28	0.19	74	0	0.362	0.5	23.03	26	27.03	28.97	1003.77	0.36	0.35	0.33	0.56	-11.38	-3	1.8	1150	0.49	-1.522	0.56	0	0.8	77.3
2004	Jan	2.87	0.21	-1.686	0.88	0.18	58	0	0.332	-0.85	24.36	26.08	26.81	28.75	1005.07	0.49	0.37	0.43	-0.12	-4.84	5	-2.2	1141	0.5	-1.6	0.41	-0.14	-1.58	36.2
2004	Feb	3.07	0.208	-1.528	-0.48	0.19	70	0	0.37	-0.6	26.03	26.7	26.98	28.57	1001.85	0.47	0.31	0.48	1.12	2.61	-1	2	1070	0.51	-1.571	0.22	-0.19	0.6	83.4
2004	Mar	2.17	0.157	0.318	0	0.16	63	0	-0.036	0.67	25.75	27.34	27.4	28.42	1014.03	0.38	0.23	0.61	0	5.45	-8	0.7	1120	0.36	-1.913	-0.01	-0.34	0.13	98.7
2004	Apr	2.72	0.107	-0.409	0.65	0.07	61	0	0.358	1.11	24.96	27.52	27.89	28.71	1011.56	0.19	0.17	0.57	0.25	10.46	37	-1.5	1012	0.46	-2.272	-0.26	0.63	0.49	114.7
2004	May	0.9	0.005	-0.094	-0.12	0.09	41	0	0.558	0.23	22.82	26.8	28	29.02	1015.18	0.12	0.17	0.88	-1.46	12.97	-32	1.7	998	0.17	-2.637	-0.12	0.31	0.4	145.3
2004	Jun	1.22	0.177	-0.236	0.61	0.14	43	0	0.315	-0.59	22.05	26.35	27.86	29.19	1016.52	0.14	0.28	0.04	-0.28	11.75	-1	-1.4	974	0.27	-2.999	-0.08	1.14	2.08	112.3
2004	Jul	1.82	0.227	-0.201	0.89	0.22	25	0	0.571	1.16	21.18	25.78	27.78	29.32	1014.98	0.23	0.47	0.44	-0.33	9.96	90	-0.8	1185	0.46	-3.376	0.08	2.18	0.34	76.9
2004	Aug	3.7	0.316	-0.72	0.9	0.17	45	15.25	0.617	-0.74	20.26	25.36	27.62	29.34	1013.88	0.35	0.64	0.85	1.52	8.74	-55	-0.5	1110	0.68	-3.253	0.22	4.44	-0.03	45.9
2004	Sep	2.96	0.24	0.855	0.82	0.16	53	29.75	0.558	0.52	20.46	25.35	27.53	29.45	1015.94	0.41	0.7	0.75	-0.11	7.29	-253	-0.6	1030	0.59	-2.993	0.33	3.67	0.26	113.7
2004	Oct	4.1	0.241	-0.515	0.56	0.18	65	0.5	0.492	-0.69	21.16	25.52	27.44	29.46	1012.55	0.46	0.67	-0.11	-1.37	8	-136	-0.1	1059	0.62	-2.731	0.14	3.16	0.89	74
2004	Nov	4.88	0.22	0.678	0.85	0.21	72	0	0.794	0.63	22.37	25.73	27.36	29.45	1011.09	0.44	0.66	-0.63	0.29	4.35	7	-1.1	1137	0.63	-2.505	0.24	2.7	0.65	106.4
2004	Dec	3.78	0.186	1.23	0.95	0.14	49	0	0.684	1.03	23.18	25.91	27.34	29.41	1009.24	0.45	0.69	-0.17	-0.04	2.45	-2	-1.3	950	0.53	-2.393	0.43	0.07	0.2	121.6
2005	Jan	2.39	0.11	0.356	0.2	0.07	70	0	0.325	1.26	24.54	25.98	27.21	29.2	1004	0.38	0.64	0.44	-0.62	-0.69	-2	0.6	1022	0.46	-2.598	0.61	-0.06	-0.93	72.7
2005	Feb	1.43	0.125	-1.271	2.23	0.1	56	0	0.816	-0.51	25.16	26.31	27.11	28.87	1008.07	0.47	0.58	0.81	-0.11	-0.96	29	-5.2	972	0.38	-2.605	0.49	-0.22	0.34	100.5
2005	Mar	2.27	0.283	-1.348	0.33	0.17	71	0	1.057	-2.32	25.03	27.14	27.73	28.93	1008.35	0.57	0.45	1.36	0.56	-0.33	24	0.5	899	0.68	-2.408	0.61	0.36	-0.22	209
2005	Apr	3.82	0.291	-0.046	0.72	0.25	69	0	0.626	-0.47	25.12	27.53	28.08	29.05	1014	0.75	0.43	1.03	1	-6.64	-17	-1	860	0.81	-2.383	0.29	1.4	-0.18	128.3
2005	May	4.58	0.292	-0.763	1.08	0.28	65	0	0.885	-1.11	24.04	27.41	28.24	29.21	1011.91	0.75	0.29	1.86	1.62	-15.09	30	-1.3	995	1.01	-2.284	-0.06	3.11	-0.08	99.5
2005	Jun	5.55	0.326	-0.383	0.39	0.34	66	0	0.589	0.26	22.35	26.68	27.77	29.14	1014.61	0.68	0.11	1.17	0.42	-20.59	172	0.7	937	0.92	-1.897	-0.26	4.42	0.79	106.1
2005	Jul	4.03	0.446	-0.03	0.35	0.38	65	11.25	0.519	-0.48	21.61	25.91	27.06	28.79	1017.01	0.53	-0.06	0.66	-0.02	-24.2	43	0.3	965	0.84	-1.885	-0.32	5.84	-1.2	49.1
2005	Aug	3.31	0.439	0.026	0.4	0.35	62	7	0.343	0.35	20.61	25.3	26.8	28.73	1014.91	0.46	-0.14	0.25	0.69	-25.87	-92	-0.6	905	0.74	-2.124	0.01	4.9	0.35	40.8
2005	Sep	4.08	0.418	0.802	-0.14	0.28	78	16.75	0.296	0.76	19.99	24.82	26.68	28.79	1016.08	0.38	-0.11	-0.46	1.32	-27.8	66	0.6	911	0.73	-1.999	-0.09	4.4	0.57	27.5
2005	Oct	3.63	0.237	0.03	-0.47	0.21	80	9.75	-0.179	-0.55	19.75	24.64	26.65	28.85	1012.96	0.37	-0.29	-1.32	1.16	-28.76	-25	2	766	0.54	-1.668	0	2.45	1	107.4
2005	Nov	3.69	0.139	0.228	0.04	0.17	75	0	-0.385	-0.46	20.23	23.97	26.11	28.55	1013.88	0.42	-0.57	-1.5	-0.74	-29.55	-12	-0.3	862	0.4	-1.264	-0.07	1.48	-1.84	60.6
2005	Dec	5.29	0.215	-2.104	-0.2	0.12	68	5	-0.55	-0.5	21.89	24	25.68	28.28	999.54	0.47	-0.81	0.2	1.07	-25.04	-3	0	907	0.55	-0.475	-0.02	-0.25	-2.04	153.7
2006	Jan	4.17	0.123	-0.17	-1.22	0.04	57	0	-0.428	0.97	24.19	24.85	25.63	27.82	1007.96	0.39	-0.79	1.03	-0.1	-18.83	-3	2.7	834	0.41	0.151	0.04	-0.17	0.71	102.5
2006	Feb	1.2	0.074	-0.156	-0.31	0	69	0	-0.414	-1.02	26.32	26.06	26.08	27.52	1014.38	0.19	-0.67	0.66	-0.44	-11.24	18	0.2	765	0.19	0.067	0.23	-0.3	2.06	129.6
2006	Mar	-0.26	0.059	-1.604	-1	0.04	62	0	-0.521	-1.75	26.2	26.65	26.57	27.73	1014.78	0.16	-0.47	0.05	-0.56	-0.38	-16	2.9	755	0.18	-0.099	0.41	-0.52	0.49	176.4
2006	Apr	1.3	0.197	0.138	-0.39	0.14	50	0	-0.571	1.2	24.04	27.16	27.5	28.29	1015.51	0.25	-0.28	0.4	0.2	5	-2	1.8	890	0.41	-0.601	0.31	-0.07	0.56	172.2
2006	May	0.83	0.308	0.156	0.63	0.16	46	0	0.045	-1.01	23.86	27.17	27.85	28.86	1016.5	0.37	-0.05	0.48	-1.03	10.36	3	-0.8	809	0.43	-1.17	0.24	0.45	0.19	76.9
2006	Jun	0.07	0.332	1.071	0.48	0.11	64	0	0.526	1.15	22.91	26.61	27.73	29.03	1016.5	0.33	0.04	1.04	-1.02	11.47	-69	-0.4	765	0.52	-1.501	0.41	0.95	-1.15	93.4
2006	Jul	-0.51	0.374	0.103	0.64	0.1	54	0	0.716	0.93	22.16	25.82	27.3	29.1	1016.33	0.3	0.12	0.35	1.29	10.75	-107	-1	758	0.36	-1.289	0.3	2.14	-1	41
2006	Aug	1.27	0.4	-0.265	1.02	0.17	71	0.25	0.748	-2.35	21.71	25.51	27.16	29.21	1018.12	0.3	0.27	-0.65	-1.45	9.1	68	-1.7	794	0.53	-1.087	0.33	4.29	-0.16	62.6
2006	Sep	1.99	0.363	0.606	0.86	0.26	64	19.5	0.8	-1.43	21.7	25.73	27.32	29.4	1014.75	0.4	0.48	-0.94	0.31	10.2	154	-1	778	0.69	-0.991	0.27	4.92	0.05	53.5
2006	Oct	3.69	0.333	-1.029	1.26	0.25	69	1.5	0.939	-1.92	22.07	25.86	27.41	29.45	1014.18	0.49	0.71	-0.05	-0.76	10.86	28	-2.1	743	0.74	-1.131	0.23	5.22	0.67	55.6
2006	Nov	4.49	0.288	0.521	0.57	0.2	72	0	1.272	0.33	22.45	26.1	27.69	29.62	1014.75	0.45	0.9	-0.22	-1.34	10.1	-23	0.1	863	0.71	-1.184	0.08	3.18	-1.84	178.8
2006	Dec	2.47	0.171	2.282	0.9	0.2	77	0	0.965	1.15	23.52	26.37	27.74	29.46	1004.94	0.42	0.95	0.14	1.55	6.21	-4	-0.5	845	0.47	-1.204	0.32	0.06	1.18	135.2
2007	Jan	2.24	0.17	2.034	0.88	0.3	96	0	0.985	-0.25	25.23	26.53	27.24	28.97	1008.53	0.4	0.71	0.01	0.27	2.61	-5	-1.3	835	0.46	-1.594	0.24	-0.04	1.81	85.1
2007	Feb	2.96	0.216	-1.307	0.3	0.36	70	0	0.537	-0.98	26.21	26.49	26.88	28.66	1008.17	0.42	0.32	0.04	-0.42	2.43	-6	-0.1	777	0.56	-1.834	0.21	0	0.15	43.1
2007	Mar	1.98	0.126	1.182	0.15	0.37	70	0	0.125	1.11	25.84	26.8	27.1	28.66	1012.74	0.44	-0.03	-0.36	-0.12	1.24	-10	0.3	722	0.33	-2.022	0.04	-0.29	-1.06	181.5
2007	Apr	0.99	0.158	0.544	0.26	0.3	76	0	0.026	0.04	24.31	26.95	27.5	28.73	1009.87	0.31	-0.23	0.16	0.97	-5.18	29	-0.2	724	0.4	-2.341	0.24	0.45	-1.61	211.8
2007	May	-0.2	0.111	0.894	0.15	0.22	68	0	0.348	0.66	22.63	26.37	27.46	28.84	1015.51	0.19	-0.29	-0.1	0.03	-14.06	-50	-0.2	744	0.21	-2.655	0.28	0.04	-0.66	110.1
2007	Jun	-0.48	0.088	-0.555	-0.07	0.16	58	0	-0.155	-1.01	21.52	25.9	27.37	28.9	1016.26	0.04	-0.41	0.09	-0.3	-21.33	-147	0.9	737	0.16	-2.697	0.43	0.19	-0.17	210.3
2007	Jul	-0.99	0.128	-0.397	0.06	0.13	62	0	-0.248	-0.55	20.98	24.85	26.71	28.68	1014.67	-0.02	-0.54	0.78	1.65	-24.92	-33	-0.5	716	0.09	-2.565	0.23	1.63	-0.09	18.1
2007	Aug	-0.24	0.054	-0.034	-0.48	0.12	60	6.75	-0.442	-0.31	19.81	23.94	26.14	28.48	1016.07	-0.06	-0.84	0.5	1.96	-27.41	281	0.7	691	0.01	-2.305	0.15	1.52	0.02	97.4
2007	Sep	0.2	0.097	0.179	-0.63	0.12	64	4.5	-1.197	0.85	19.75	23.63	25.61	28.11	1013.92	-0.05	-1.13	-0.36	1.52	-28.13	-209	0.3	670	0.11	-1.865	0.27	1.63	1.2	51.9
2007	Oct	2.42	0.157	0.383	-1.14	0.09	60	0	-1.217	1	19.5	23.55	25.32	27.91	1013.33	-0.02	-1.4	-1.45	0.77	-29.05	-126	1.2	675	0.24	-1.291	0.11	1.4	0.4	119.5
2007	Nov	3.5	0.176	-0.519	-1.23	0.11	57	1	-1.155	0.48	19.92	23.48	25.17	27.61	1007.59	-0.01	-1.54	-1.08	0.65	-27.61	40	1.4	696	0.24	-0.302	0.1	0.47	-0.04	148.4
2007	Dec	2.58	0.11	0.821	-1.6	0.06	49	0	-1.178	0.23	21.15	23.57	25.01	27.42	1010.56	0.01	-1.6	-0.58	-0.16	-19.48	-1	2.7	785	0.09	0.85	0.2	-0.16	0.37	78.5
2008	Jan	2.15	0.03	0.819	-1.75	0.06	25	0	-1.006	0.53	24.08	24.19	24.86	26.87	1009.33	0.03	-1.59	-1	-1.06	-12.42	-5	2.9	743	0.14	1.836	0.19	-0.17	0.92	98.1
2008	Feb	0.98	0.128	0.938	-2.52	-0.01	36	0	-1.371	0.38	26.32	25.16	25.08	26.62	1005.85	0.08	-1.42	-0.77	0.37	-4.7	-2	4.4	711	0.18	2.404	0.36	-0.28	0.01	216.2
2008	Mar	0.12	0.158	0.586	-1.24	-0.02	73	0	-1.552	-0.32	26.88	26.45	26.07	26.97	1013.19	0.11	-1.19	-0.71	-0.61	2.19	-5	2.4	729	0.27	2.671	0.6	-0.53	-1.35	186.4
2008	Apr	-1.87	0.042	-0.455	-0.93	-0.02	53	0	-0.858	-1.31	25.94	27.12	26.83	27.46	1018.18	0.1	-0.92	-1.52	-1.18	6.43	-7	1.1	702	0.09	2.493	0.64	0.17	0.28	167.9
2008	May	-0.64	0.172	-1.205	-0.27	-0.01	50	0	-0.345	-1.55	24.95	27	27.09	27.81	1014.14	0.09	-0.75	-1.37	1.25	11.53	16	-0.1	684	0.28	2.015	0.82	-0.31	-0.66	150.4
2008	Jun	-0.59	0.255	-0.09	-0.46	-0.06	48	0	0.142	-1.09	23.68	26.46	27.04	27.96	1016.95	0.09	-0.54	-1.34	-1.76	13.45	201	1	659	0.39	1.613	0.7	-0.02	-0.36	94.7
2008	Jul	-0.41	0.205	-0.48	0.02	-0.08	60	8.75	0.088	-1.24	22.95	26.08	26.99	28.07	1016.56	0.11	-0.35	-1.67	-0.51	13.27	172	0.5	657	0.45	1.429	0.66	0.99	0.02	83.6
2008	Aug	0.08	0.174	-0.08	-0.35	-0.06	44	3	-0.269	-1.62	22.4	25.62	26.72	28.04	1014.83	0.2	-0.26	-1.7	0.89	11.63	178	1.7	663	0.45	1.173	0.51	3.42	-1.32	101.4
2008	Sep	2.09	0.198	-0.327	-0.8	-0.01	65	13.5	-0.58	1.14	21.75	25.2	26.47	28.08	1013.98	0.26	-0.3	-1.55	0.89	11.6	23	2	671	0.57	0.955	0.28	2.7	-0.83	87.3
2008	Oct	2.81	0.102	1.676	-0.82	-0.05	67	3	-0.699	0.47	21.37	25.07	26.37	28.17	1015.42	0.23	-0.41	-1.76	1.11	11.05	73	2.1	683	0.43	0.839	0.27	2.62	0.19	187.8
2008	Nov	1.84	0	0.092	-0.89	-0.12	67	2.25	-0.588	-0.47	21.38	24.98	26.25	27.98	1010.81	0.14	-0.6	-1.25	1.05	9.13	-17	2.2	686	0.27	0.787	0.31	1.84	0.33	92.2
2008	Dec	1.89	0.018	0.648	-1.07	-0.14	54	0	-0.646	-0.35	22.36	24.66	25.74	27.73	1014.72	0.05	-0.73	-0.87	-1.71	10.46	-2	2.4	692	0.26	0.779	0.41	-0.3	1.01	40.6
2009	Jan	0.67	-0.059	0.8	-1.32	-0.14	61	0	-0.714	-0.52	24.4	25.15	25.66	27.37	1009.59	-0.12	-0.8	-1.4	0.13	10.71	-5	1.8	698	0.07	0.793	0.45	-0.17	0.01	187.7
2009	Feb	-2.79	-0.165	-0.672	-1.95	-0.12	52	0	-0.69	-0.38	25.42	25.84	25.96	27.35	1014.81	-0.29	-0.69	-1.55	-1.57	12.33	7	3.1	700	-0.37	0.753	0.35	-0.3	1.71	83.2
2009	Mar	-3.72	-0.16	0.121	-0.3	-0.09	53	0	-0.705	0.19	25.67	26.49	26.59	27.74	1017.4	-0.4	-0.52	-1.59	-1.29	11.44	-4	0.7	692	-0.34	0.514	0.54	-0.76	0.22	103.8
2009	Apr	-4.03	-0.131	0.973	-0.54	-0.03	61	0	-0.106	-0.36	25.94	27.41	27.47	28.37	1015.88	-0.38	-0.24	-1.65	-0.04	9.11	-33	1.3	697	-0.31	0.107	0.52	-0.11	0.02	136.2
2009	May	-5.29	-0.062	1.194	0.68	0.08	65	0	0.326	1.61	24.76	27.54	27.99	28.9	1016.03	-0.25	0.09	-0.88	-0.43	1.56	-23	-0.2	705	-0.23	-0.284	0.79	0.25	-0.67	56
2009	Jun	-3.6	0.121	-1.351	0.64	0.15	65	0	0.751	-0.91	23.78	27.18	28.04	29.14	1013.16	-0.01	0.35	-0.31	0.48	-5.47	0	0.2	686	0.05	-0.476	0.59	1.85	-1.74	85.7
2009	Jul	0.11	0.227	-1.356	0.63	0.22	72	0	1.06	-2.11	22.71	26.49	27.78	29.19	1015.78	0.18	0.47	-0.53	0.72	-12.21	-148	0.4	682	0.45	-0.848	0.39	3.8	1.2	100.6
2009	Aug	0.33	0.152	-0.054	1.02	0.29	66	7	1.05	-0.37	21.85	25.92	27.42	29.23	1016.23	0.26	0.54	0.09	0.62	-14.45	216	-0.3	674	0.41	-1.309	0.24	4.09	0.66	44.4
2009	Sep	0.45	0.057	0.875	0.35	0.38	70	2.75	0.707	1.62	21.23	25.69	27.4	29.33	1013.6	0.27	0.65	0.52	1.03	-13.81	319	0.5	705	0.35	-1.687	0.19	3.77	-1.02	31.8
2009	Oct	2.56	0.164	-1.54	1.83	0.41	65	0	0.883	-0.61	21.34	25.76	27.6	29.68	1010.73	0.27	0.95	0.27	0.64	-11.69	55	-2	723	0.63	-2.025	0.45	4.87	-2.05	58.7
2009	Nov	2.53	0.069	0.459	1.51	0.42	77	2.25	1.107	-0.16	21.99	26.18	28.16	29.82	1012.19	0.29	1.31	-0.4	0.19	-13.83	11	-1	736	0.51	-2.418	0.3	3.17	1.27	119
2009	Dec	1.01	0.082	-3.413	1.73	0.29	65	0	1.059	-1.88	23.41	26.55	28.34	29.72	1004.34	0.39	1.57	0.08	0.04	-15.57	-3	-1.2	768	0.54	-2.571	0.7	0.79	-1.07	114.2
2010	Jan	1.98	0.039	-2.587	1.62	0.22	73	0	1.066	-1.8	24.85	26.73	28.07	29.44	1000.04	0.57	1.55	0.83	0.96	-16.02	-5	-1.8	811	0.8	-2.649	0.79	0	0.47	75.7
2010	Feb	3.96	0.177	-4.266	1.94	0.15	79	0	1.526	-2.69	26.22	27.28	28.01	29.08	1005.01	0.83	1.31	0.82	0.48	-16.98	-2	-2.4	847	1.07	-2.398	0.68	0.64	0.23	145
2010	Mar	5.01	0.287	-0.432	1.21	0.2	92	0	1.462	-1.33	26.56	27.76	28.18	29.07	1010.87	1.04	0.94	0.44	1.68	-19.68	-12	-1.1	834	1.27	-2.127	0.89	1.85	1.83	87.7
2010	Apr	5.3	0.425	-0.275	-0.14	0.31	87	0	0.978	-0.93	25.43	27.85	28.2	29.13	1015.22	1.13	0.44	0.78	1.26	-23.57	7	2	759	1.4	-1.75	0.68	4.04	0.88	117.5
2010	May	6.11	0.459	-0.919	-0.76	0.39	74	0	0.658	-1.33	24.65	27.08	27.71	29.01	1016.23	1.02	-0.09	0.62	-0.73	-26.28	88	1.5	738	1.35	-1.548	0.62	6.14	-2.5	134.9
2010	Jun	4.17	0.447	-0.013	-0.69	0.4	64	1	-0.228	-0.52	23.14	25.91	27.04	28.66	1015.99	0.85	-0.59	-0.22	-0.1	-25.05	144	0.6	725	1.11	-0.957	0.85	7.32	-0.08	118.9
2010	Jul	3.84	0.449	0.435	-2.17	0.36	62	0.5	-1.103	-0.39	20.93	24.79	26.22	28.1	1018.84	0.69	-1.03	-1.05	0.89	-9.84	123	3	798	1.01	-0.564	0.6	5.94	-2.38	91.7
2010	Aug	4.19	0.525	-0.117	-2.33	0.27	65	9.5	-1.671	-1.69	19.7	23.97	25.47	27.54	1018.11	0.6	-1.38	-1.27	1.07	1.45	61	3	795	0.97	-0.218	0.48	4.95	0.41	46.8
2010	Sep	4.92	0.449	-0.865	-2.76	0.2	61	18.5	-1.879	-0.62	19.5	23.61	25.12	27.32	1012.75	0.54	-1.61	-1.61	1.07	6.58	477	3.7	811	0.75	0.113	0.23	3.24	0.05	45.6
2010	Oct	6.11	0.323	-0.467	-2.35	0.1	71	7.5	-1.892	-0.5	19.73	23.5	25.03	27.15	1011.56	0.51	-1.7	-1.06	2.15	10.83	211	2.9	817	0.77	0.681	0.43	2.94	0.67	43.4
2010	Nov	6.32	0.235	-0.376	-1.83	-0.01	79	1.5	-1.477	-1.84	20.34	23.59	25.06	27.11	1013.83	0.61	-1.69	-0.82	-0.81	12.16	-8	2.1	825	0.7	1.167	0.4	2.27	-0.33	55.5
2010	Dec	7.8	0.207	-2.631	-2.99	-0.13	48	0	-1.558	-1.8	21.91	23.73	25	27.09	1013.51	0.79	-1.59	-1.21	-2.08	10.97	-3	4.8	842	0.96	1.53	0.41	0.1	-1.26	93.5
2011	Jan	7.01	0.143	-1.683	-2.46	-0.2	51	0	-1.719	-1.53	24.08	24.4	25	26.92	1003.18	0.81	-1.37	-0.92	1	9.18	-4	3.8	834	0.97	1.523	0.45	-0.17	-1.37	123.2
2011	Feb	3.3	0.107	1.575	-3.07	-0.13	53	0	-1.544	0.35	25.94	25.63	25.64	27.15	1015.8	0.64	-1.09	-0.83	-2.41	10.05	3	4.5	946	0.53	1.577	0.59	-0.28	-0.13	91
2011	Mar	1.37	0.055	1.424	-2.34	0.02	64	0	-1.554	0.24	25.61	26.47	26.36	27.51	1009.34	0.43	-0.83	-0.69	0.38	10.44	-4	4.2	1158	0.41	1.546	0.72	-0.85	-0.1	83.2
2011	Apr	0.16	0.091	2.275	-1.69	0.12	65	0	-1.387	2.55	25.34	27.25	27.05	27.89	1015.1	0.33	-0.64	-0.42	-1.78	10.71	-27	3.1	1125	0.33	1.271	0.49	-0.75	-1.93	224.4
2011	May	0.96	0.151	-0.035	-0.53	0.21	53	0	-0.199	-0.01	24.53	26.96	27.41	28.35	1014.86	0.37	-0.47	-0.37	0.25	10.02	-37	0.6	958	0.41	0.844	0.3	0	0.38	120
2011	Jun	1.87	0.178	-0.858	-0.23	0.16	59	0	-0.003	-0.98	23.42	26.5	27.35	28.46	1014.75	0.34	-0.38	-0.69	0.35	3.9	-38	0.4	958	0.59	0.675	0.2	2.13	0.81	105.2
2011	Jul	0.97	0.091	-0.472	-0.81	0.18	73	0	-0.193	-1.48	22.06	25.61	26.87	28.42	1017.27	0.33	-0.46	-1.86	-0.75	0.44	-153	1.6	941	0.43	0.387	0.27	2.64	-0.27	143.1
2011	Aug	0.78	0.146	-1.063	-0.77	0.16	73	6.25	-0.517	-1.85	20.79	24.73	26.21	28.16	1015.04	0.23	-0.65	-1.74	1.4	-0.49	174	0.7	1017	0.49	0.168	0.2	3.53	-0.51	61.1
2011	Sep	2.24	0.144	0.665	-1.2	0.11	56	12.25	-0.778	0.67	19.99	24.29	25.92	28	1012.88	0.16	-0.89	-1.79	-0.39	-2.3	-160	1.7	1345	0.36	-0.029	0.24	1.42	0.51	89.2
2011	Oct	3.32	0.062	0.8	-1.13	0.04	66	7.5	-0.939	0.94	20.24	23.92	25.67	27.86	1012.67	0.07	-1.06	-1.34	0.86	-3.05	-91	1.2	1372	0.44	0.07	0.28	1.65	1.06	109.4
2011	Nov	3.36	-0.071	1.459	-1.4	0.02	56	0	-0.938	1.3	21.09	23.98	25.52	27.8	1014.06	0	-1.14	-2.33	-0.76	-9.09	-17	1.8	1531	0.21	0.363	-0.05	1.67	0.39	130
2011	Dec	4.47	-0.045	2.221	-2.37	0.05	54	0	-0.945	2.25	22.13	24.31	25.54	27.53	1009.69	-0.05	-1.03	-1.79	0.06	-16.25	-3	4.1	1412	0.23	0.844	-0.48	-0.26	-0.39	119.4
2012	Jan	3.13	-0.066	-0.22	-1.3	0.12	46	0	-0.98	0.86	24.38	25.09	25.67	27.3	1007.49	-0.08	-0.81	-1.38	0.13	-16.07	-5	1.8	1331	0.16	1.082	-0.32	-0.16	-1.58	138.3
2012	Feb	1.33	0.003	-0.036	-0.84	0.13	49	0	-0.675	0.03	26.46	26.22	26.08	27.29	1006.07	-0.15	-0.62	-0.85	0.7	-15.25	8	0.8	1068	-0.02	1.479	-0.51	-0.14	1.01	137.5
2012	Mar	-2.18	0.025	1.037	-0.85	0.13	57	0	-0.382	0.93	26.65	27.02	26.67	27.56	1014.31	-0.17	-0.5	-1.05	-0.19	-16.74	-6	1.2	1150	-0.26	1.613	-0.08	-0.5	0.82	99
2012	Apr	-1.23	0.079	-0.035	-0.08	0.15	69	0	0.11	0.37	26.44	27.56	27.32	28.03	1015.06	-0.1	-0.38	-0.27	-0.09	-17.62	10	-0.4	1131	-0.17	1.596	-0.33	0.44	-0.29	78.2
2012	May	-0.85	0.163	0.168	0.06	0.2	76	0	0.757	-0.79	25.29	27.34	27.61	28.4	1016.26	0	-0.18	-1.26	-0.29	-22.04	72	0.1	1215	0.09	1.191	-0.04	0.3	-1.66	62.6
2012	Jun	0.48	0.299	-0.672	0.56	0.24	62	0.75	0.842	-2.25	24.14	27.05	27.75	28.58	1014.66	0.15	0.05	-0.87	-0.42	-25.89	41	-0.7	1209	0.31	0.601	0.04	1.77	-1.39	67.8
2012	Jul	0.74	0.374	0.168	0.62	0.24	57	0	1.126	-1.29	22.36	26.37	27.54	28.64	1018.38	0.24	0.27	-1.52	-0.57	-27.82	413	-0.1	1361	0.3	-0.046	-0.03	2.88	0.58	51.6
2012	Aug	2.05	0.43	0.014	0.67	0.28	63	6	0.607	-1.39	21.07	25.64	27.32	28.86	1016.97	0.4	0.33	-1.93	-0.2	-27.93	400	-0.3	1157	0.52	-0.718	-0.08	4.44	-0.07	53
2012	Sep	3.49	0.448	0.772	0.24	0.33	76	13.75	0.316	-0.43	20.79	25.24	27.1	28.97	1015.32	0.48	0.31	-2.21	-0.39	-26.6	266	0.4	1230	0.72	-1.412	0.02	4.72	0.69	29.7
2012	Oct	4.97	0.329	-1.514	-0.05	0.34	78	8	0.069	-1.73	20.65	25	26.98	29.07	1012.85	0.52	0.21	-0.79	-1.13	-24.51	-3	0.5	1232	0.78	-1.74	0.03	4.51	-2.53	87.9
2012	Nov	5.35	0.164	-0.111	0.03	0.35	75	0	0.127	-0.74	21.24	25.08	26.86	29	1012.29	0.46	0.01	-0.59	-1.06	-18.95	42	0.4	1209	0.75	-1.626	0.03	3.89	-2.02	109.9
2012	Dec	3.92	0.14	-1.749	0.46	0.31	53	0	0.111	0.07	21.96	24.8	26.34	28.6	1009.34	0.44	-0.21	-0.48	-1.31	-10.02	-2	-1	1083	0.55	-1.515	0.18	0.17	-0.58	66.4
2013	Jan	2.86	0.127	-0.61	-0.13	0.36	68	0	0.103	-0.11	23.89	25	26.01	28.24	1006.32	0.43	-0.38	-0.13	0.05	-6.07	-3	-0.1	1271	0.44	-1.149	0.39	-0.14	0.07	76.7
2013	Feb	1.63	0.115	-1.007	-0.04	0.3	55	0	-0.068	-0.96	25.37	25.84	26.24	28.01	1009.7	0.46	-0.33	-0.43	0.3	-1.23	8	-0.4	1042	0.4	-0.999	0.25	-0.1	1.49	92.8
2013	Mar	3.72	0.157	-3.185	-1.11	0.21	65	0	-0.026	-2.09	25.81	27.08	27.03	27.95	1013.91	0.48	-0.24	-0.63	-0.26	2.85	5	2.5	1113	0.7	-1.167	0.26	-0.6	0.59	77.3
2013	Apr	2.22	0.136	0.322	-0.13	0.08	52	0	0.09	0.6	24.31	27.22	27.57	28.36	1016.05	0.53	-0.21	-0.16	-1.76	8.39	90	0.4	1251	0.53	-1.528	0.35	0.36	-1.86	44.1
2013	May	3.12	0.1	0.494	-0.74	0.01	61	0	0.205	0.58	22.83	26.43	27.53	28.69	1015.92	0.41	-0.27	0.08	-0.24	12.64	-75	1.3	1313	0.64	-1.929	0.48	-0.38	-1.13	156.9
2013	Jun	0.86	0.045	0.549	-0.78	-0.03	66	0	-0.094	0.83	21.22	25.73	27.3	28.77	1015.75	0.29	-0.34	-0.78	-0.35	13.38	-56	2	1101	0.32	-2.379	0.28	0.6	-0.47	115.5
2013	Jul	0.75	0.189	-0.011	-0.7	-0.03	59	0	-0.314	0.7	20.36	25.1	26.91	28.66	1018.26	0.22	-0.38	-1.25	-0.71	14.27	-152	1.3	1155	0.34	-2.398	0.23	0.34	-0.88	109.7
2013	Aug	1.63	0.193	0.154	-0.32	-0.03	67	0	-0.481	1.12	19.85	24.47	26.47	28.61	1013.93	0.22	-0.35	-1.04	-0.06	14.66	389	0.3	1154	0.56	-2.185	0.25	3.73	-0.17	48.9
2013	Sep	2.9	0.254	-0.461	-0.18	0.18	78	3.25	-0.155	0.38	19.95	24.58	26.54	28.65	1013.17	0.35	-0.31	-0.48	0.41	13.12	76	0.5	1026	0.61	-1.936	0.03	3.87	1.93	40.1
2013	Oct	4.48	0.346	0.263	-0.14	0.29	69	0	0.115	-0.88	20.27	24.79	26.52	28.72	1012.5	0.28	-0.23	-0.87	-0.21	11.69	15	-0.1	1324	0.66	-1.583	0.04	4.32	-0.09	79.1
2013	Nov	3.06	0.127	2.029	-0.54	0.32	81	0	-0.053	0.81	21.09	24.9	26.56	28.74	1015.44	0.19	-0.22	-0.11	-1.14	12.45	-6	1.2	1483	0.32	-1.043	-0.07	2.14	-0.04	33.5
2013	Dec	2.85	0.036	1.475	-0.01	0.2	67	0	-0.234	0.79	22.37	25.09	26.43	28.48	1010.29	0.1	-0.27	-0.41	-1.16	12.55	0	0.1	1477	0.27	-1.077	0.11	0.09	-2.01	65.6
2014	Jan	0.77	-0.063	-0.969	-1.26	0.16	74	0	-0.27	-0.17	24.56	25.23	26.05	28.14	1002.87	0.01	-0.37	0.3	0.59	13.13	9	2.4	1601	0.13	-1.358	0.11	-0.04	0.54	93.8
2014	Feb	-1.92	-0.043	0.044	-0.37	0.19	52	0	-0.259	1.07	25.49	25.62	26.14	28.27	1010.84	-0.19	-0.36	0.38	-1.57	12.68	3	0.1	1702	-0.08	-1.503	0.22	0.09	-1.37	55.3
2014	Mar	-4.4	-0.082	1.206	0.54	0.23	77	0	0.018	0.44	26.17	26.89	27	28.6	1009.58	-0.23	-0.17	0.97	-0.5	11.72	0	-1.5	1499	-0.35	-1.408	0.22	0.53	-0.43	147.9
2014	Apr	-3.68	-0.095	0.972	-0.17	0.18	79	0	0.295	0.19	25.51	27.64	27.9	28.98	1010.81	-0.17	0.13	1.13	0	7.15	2	1.3	1442	-0.21	-1.483	0.23	1.47	-1.36	72.9
2014	May	-3.8	-0.002	0.464	0.09	0.1	87	0	1.001	-0.8	25.48	27.64	28.25	29.45	1017.44	-0.05	0.3	1.8	-0.59	-2.81	346	0.9	1302	-0.06	-1.122	0.48	1.59	-0.85	127
2014	Jun	-4.29	0.061	-0.507	0.37	0.13	66	0	1.046	-0.67	24.67	27.15	27.96	29.36	1016.41	0.02	0.23	0.82	-1.44	-13.98	53	0.3	1221	-0.05	-0.636	0.47	1.92	-0.3	73.5
2014	Jul	-2.13	0.221	-0.489	0.42	0.21	58	2.25	0.915	0.21	22.94	26.12	27.23	29.04	1016.73	0.11	0.07	0.7	0.5	-19.29	-214	-0.3	1373	0.14	-0.406	0.17	3.78	-1.63	76.4
2014	Aug	-0.34	0.334	-0.372	0.7	0.3	82	4.25	0.937	-2.28	21.9	25.3	26.82	29.04	1014.39	0.21	0.03	0.67	1.35	-21.64	184	-1.2	1252	0.23	-0.499	0.24	4.64	-0.77	59.9
2014	Sep	1.8	0.309	0.102	0.97	0.34	91	4.5	0.557	1.72	21.52	25.27	27.01	29.16	1012.06	0.34	0.18	1.08	0.78	-23.24	179	-1.2	1477	0.51	-0.813	0.26	4.95	-1.23	91.2
2014	Oct	3.18	0.291	-1.134	0.76	0.35	86	6.75	0.421	-0.87	21.71	25.56	27.16	29.24	1011.17	0.34	0.44	1.49	1.14	-23.86	29	-1	1551	0.56	-1.238	0.16	4.81	-0.32	114.5
2014	Nov	3.1	0.064	-0.53	1.24	0.35	68	0	0.754	0.58	22.45	25.88	27.46	29.43	1008.51	0.26	0.59	1.72	0.64	-23.65	16	-1.5	1547	0.35	-1.715	-0.32	2.88	0.13	80.8
2014	Dec	1.35	0.058	0.413	0.87	0.36	79	0	0.566	1.63	23.22	25.91	27.31	29.3	1005.1	0.18	0.66	2.51	0.37	-25.38	-2	-0.9	1589	0.34	-2.117	-0.12	0.17	-0.13	61.4
2015	Jan																												183.1
2015	Feb																												72.9
2015	Mar																												163.6
2015	Apr																												121.1
2015	May																												78
2015	Jun																												126.7
2015	Jul																												158.5
2015	Aug																												75.3
2015	Sep																												58.3
2015	Oct																												107.7
2015	Nov																												69
2015	Dec																												65.5
